# Supplementary material for: Synthesis of New C-3 Substituted Kynurenic Acid Derivatives
Source: PubMed Central journal article supplement (PMC7071119; doi:10.3390/molecules25040937), 2020-02-19
Supplement: molecules-25-00937-s001.pdf [file molecules-25-00937-s001.pdf]

*Supplementary Information*

# Synthesis of New C-3 Substituted Kynurenic Acid Derivatives

**Bálint Lőrinczi**<sup>1,2</sup>, **Antal Csámpai**<sup>3</sup>, **Ferenc Fülöp**<sup>1,2</sup> and **István Szatmári**<sup>1,2,\*</sup>

<sup>1</sup> Institute of Pharmaceutical Chemistry and Research Group for Stereochemistry, Hungarian Academy of Sciences, University of Szeged, H-6720 Szeged, Eötvös u. 6, Hungary; lorinczi.balint@pharm.u-szeged.hu (B.L.); fulop@pharm.u-szeged.hu (F.F.)

<sup>2</sup> Institute of Pharmaceutical Chemistry, University of Szeged, Interdisciplinary Excellence Center; H-6720 Szeged, Eötvös u. 6, Hungary

<sup>3</sup> Department of Inorganic Chemistry, Eötvös Loránd University (ELTE), Pázmány P. sétány 1/A, H-1117 Budapest, Hungary; csampai@caesar.elte.hu

\* Correspondence: szatmari.istvan@pharm.u-szeged.hu; Tel.: +36-62-341-966

3-(((2-Morpholinoethyl)amino)methyl)-4-oxo-1,4-dihydroquinoline-2-carboxylic acid (2)

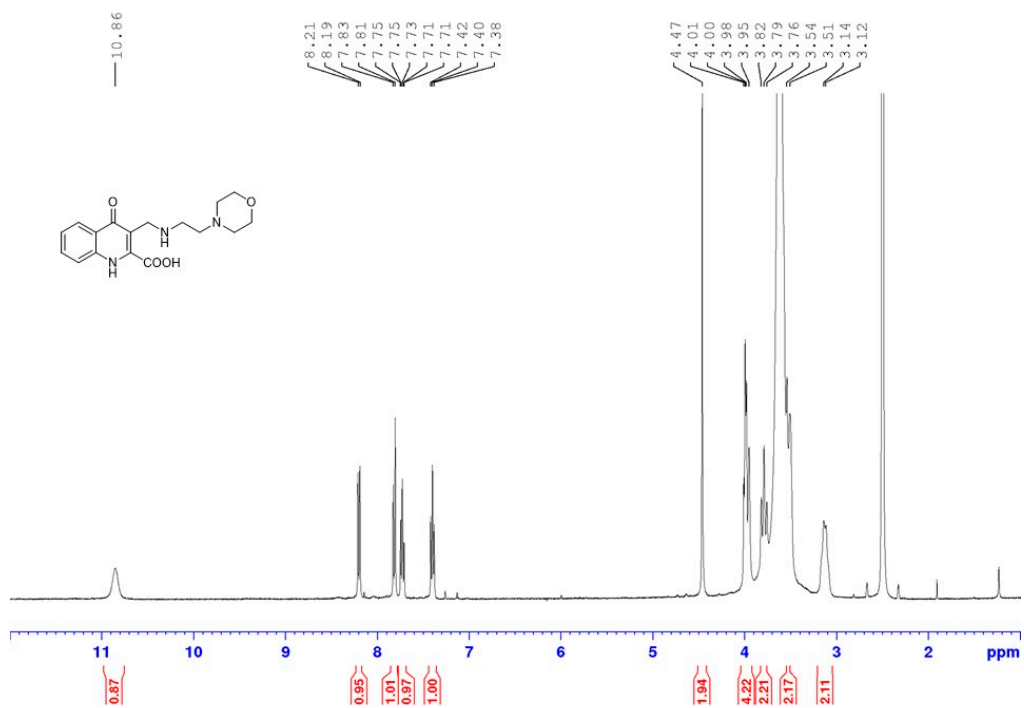

Figure S1. <sup>1</sup>H-NMR spectrum of 2

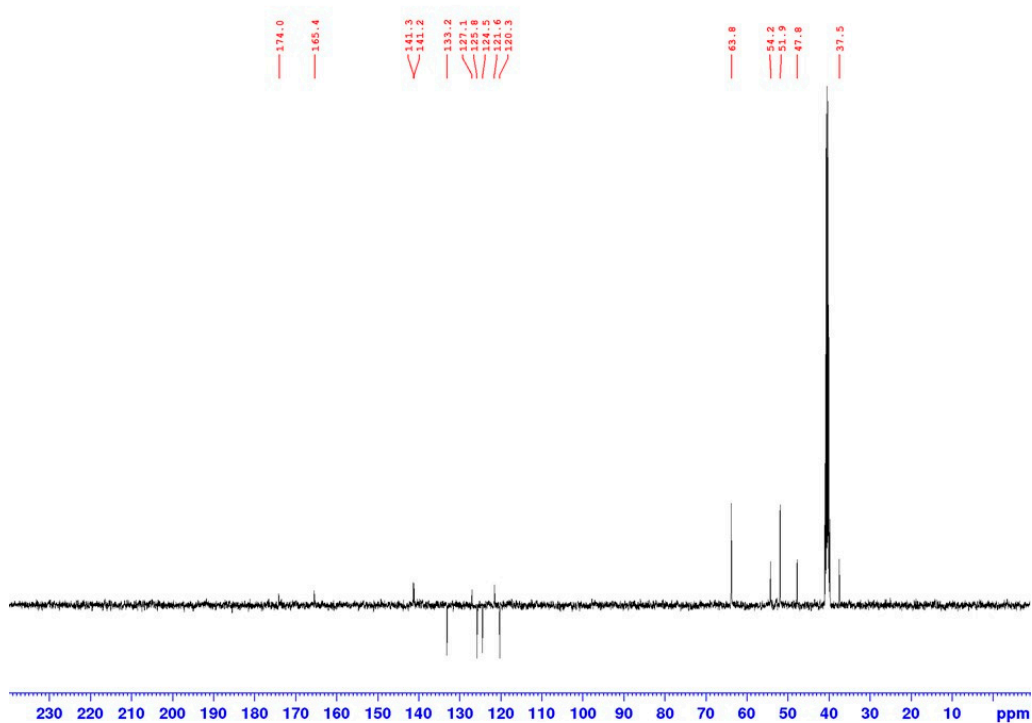

Figure S2. <sup>13</sup>C-NMR spectrum of 2

3-(((2-(Dimethylamino)ethyl)amino)(phenyl)methyl)-4-oxo-1,4-dihydroquinoline-2-carboxylic acid (**3**)

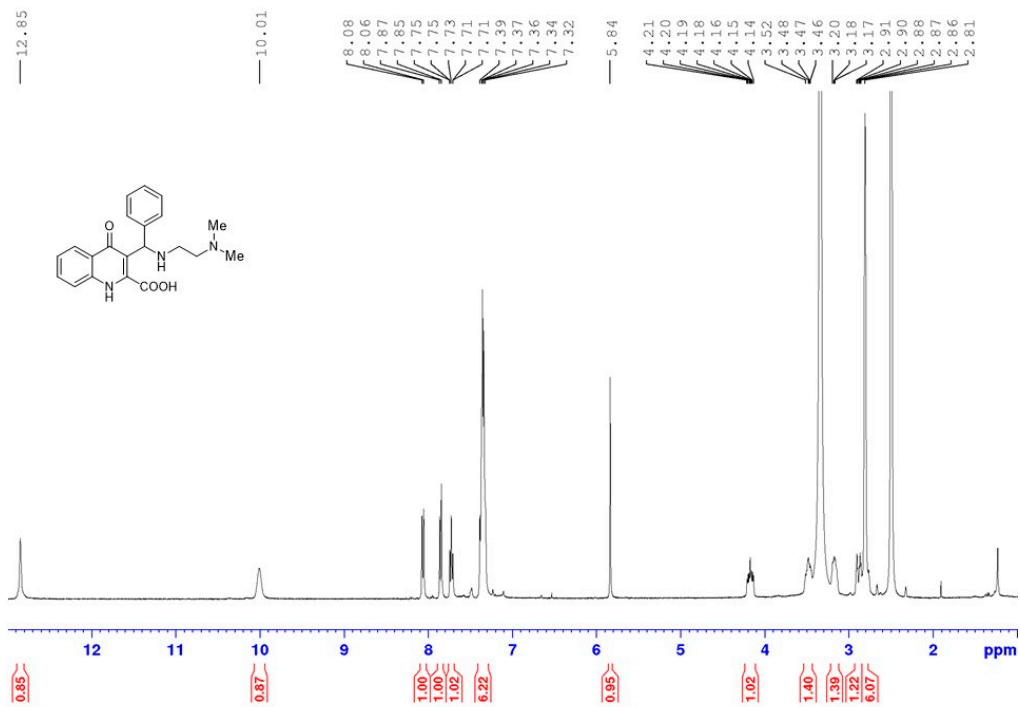

Figure S3. <sup>1</sup>H-NMR spectrum of **3**

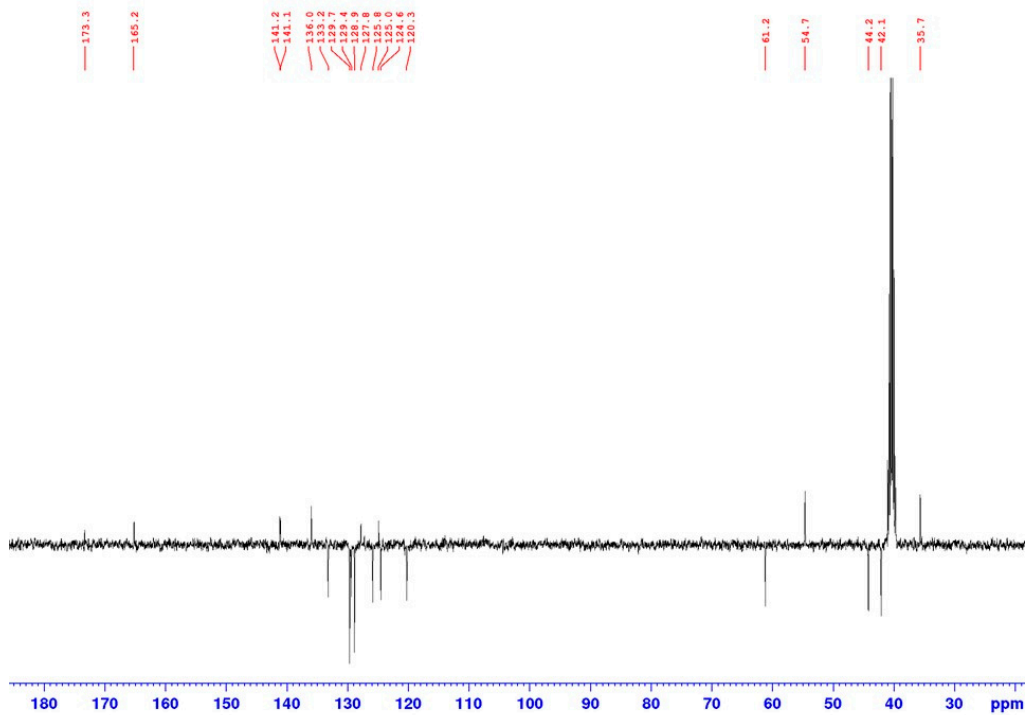

Figure S4. <sup>13</sup>C-NMR spectrum of **3**

3-((Dimethylamino)methyl)-4-oxo-1,4-dihydroquinoline-2-carboxylic acid (4a)

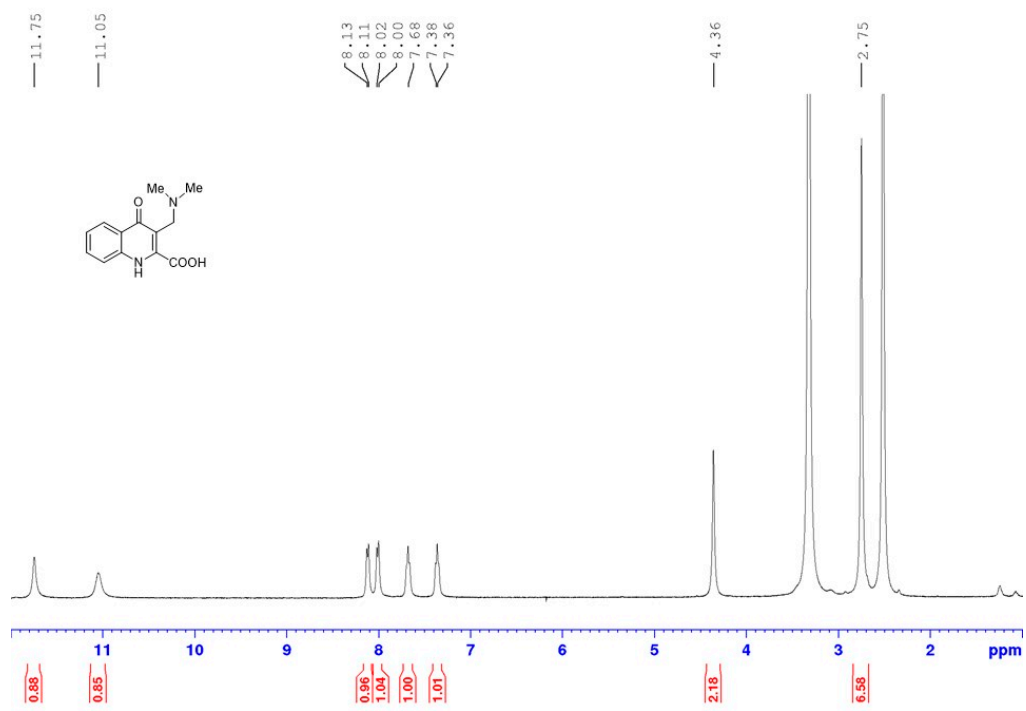

Figure S5. <sup>1</sup>H-NMR spectrum of 4a

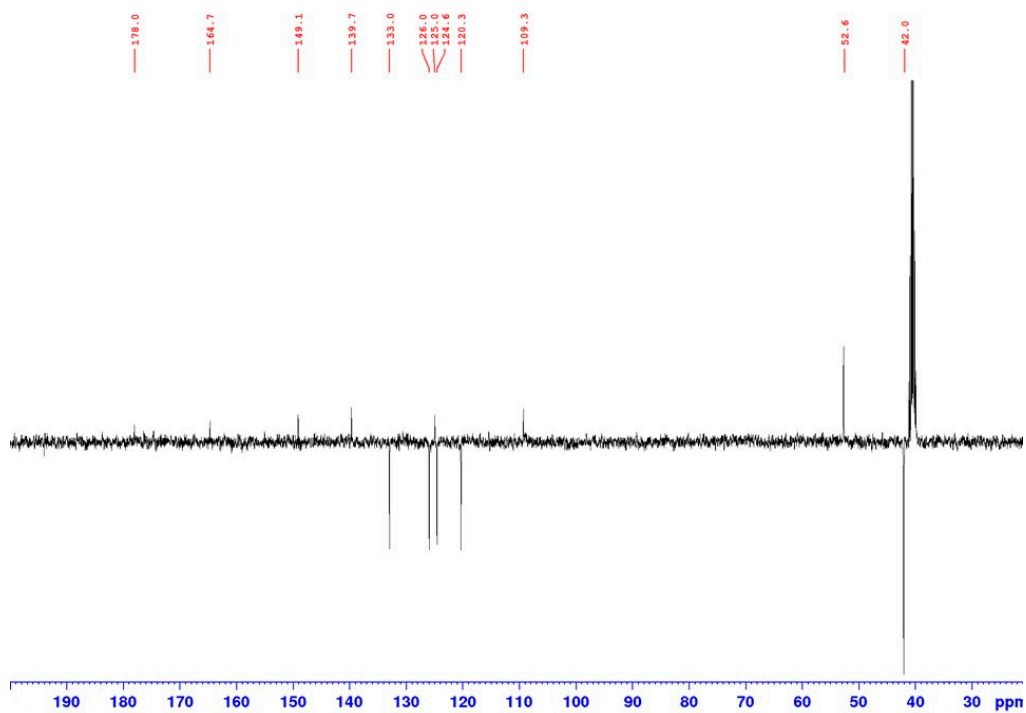

Figure S6. <sup>13</sup>C-NMR spectrum of 4a

3-((Benzyl(methyl)amino)methyl)-4-oxo-1,4-dihydroquinoline-2-carboxylic acid (**4b**)

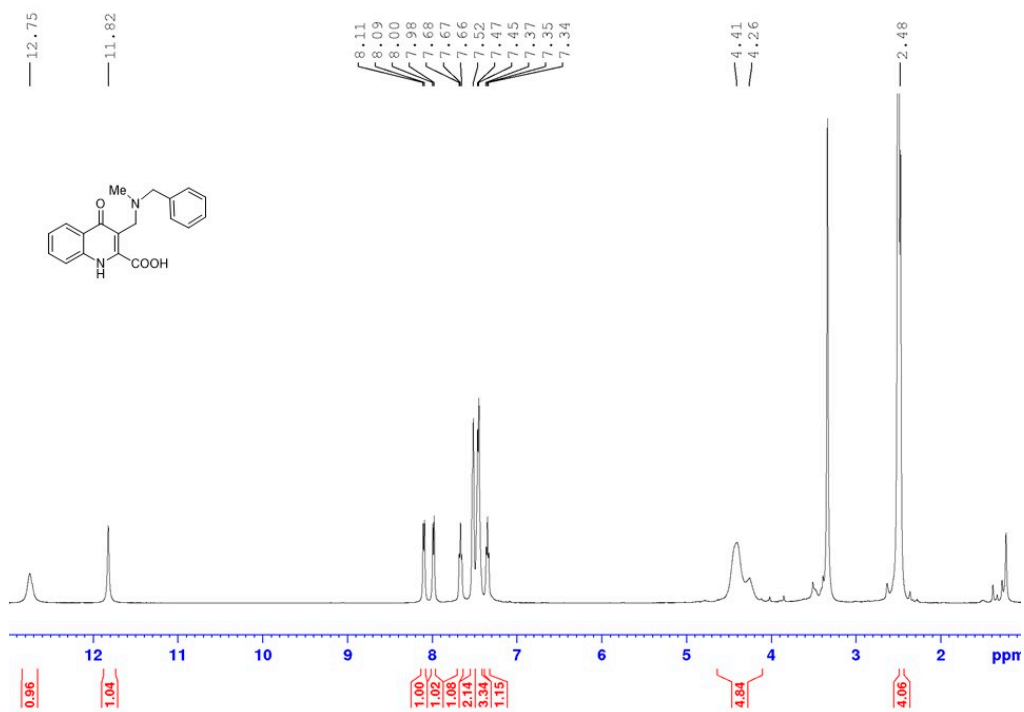

Figure S7. <sup>1</sup>H-NMR spectrum of **4b**

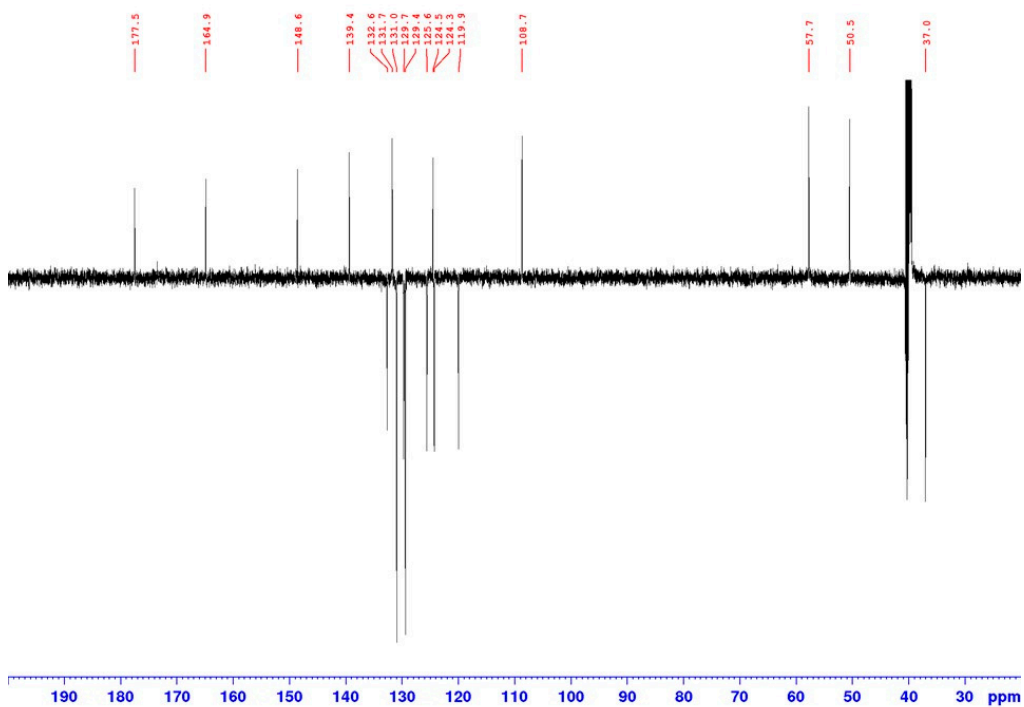

Figure S8. <sup>13</sup>C-NMR spectrum of **4b**

4-Oxo-3-(piperidin-1-ylmethyl)-1,4-dihydroquinoline-2-carboxylic acid (**5b**)

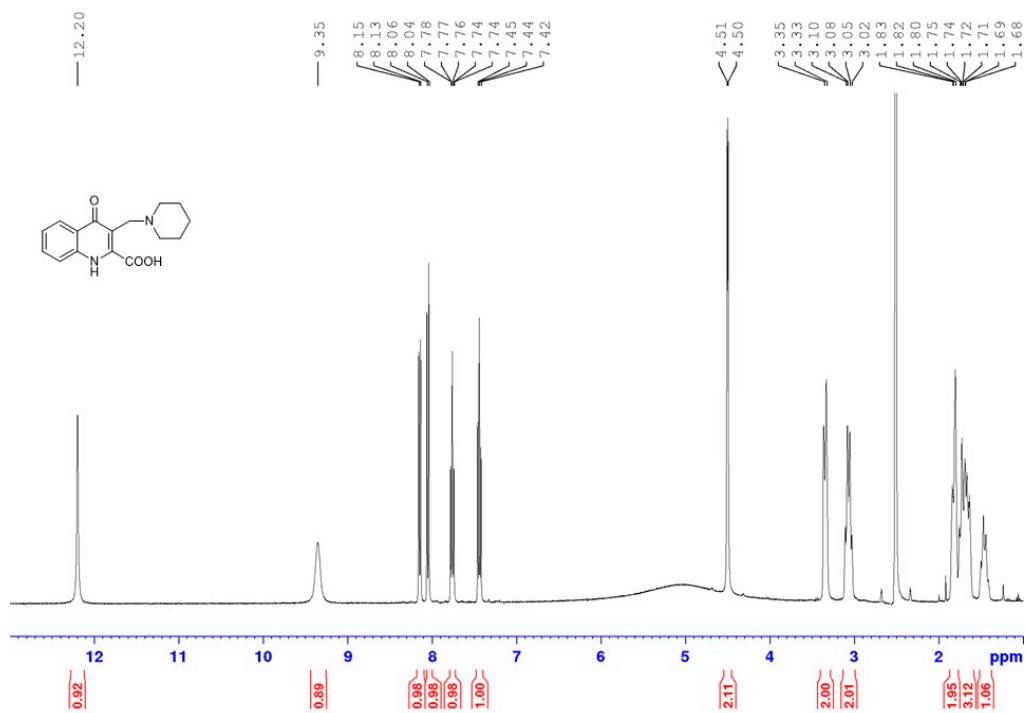

Figure S9. <sup>1</sup>H-NMR spectrum of **5b**

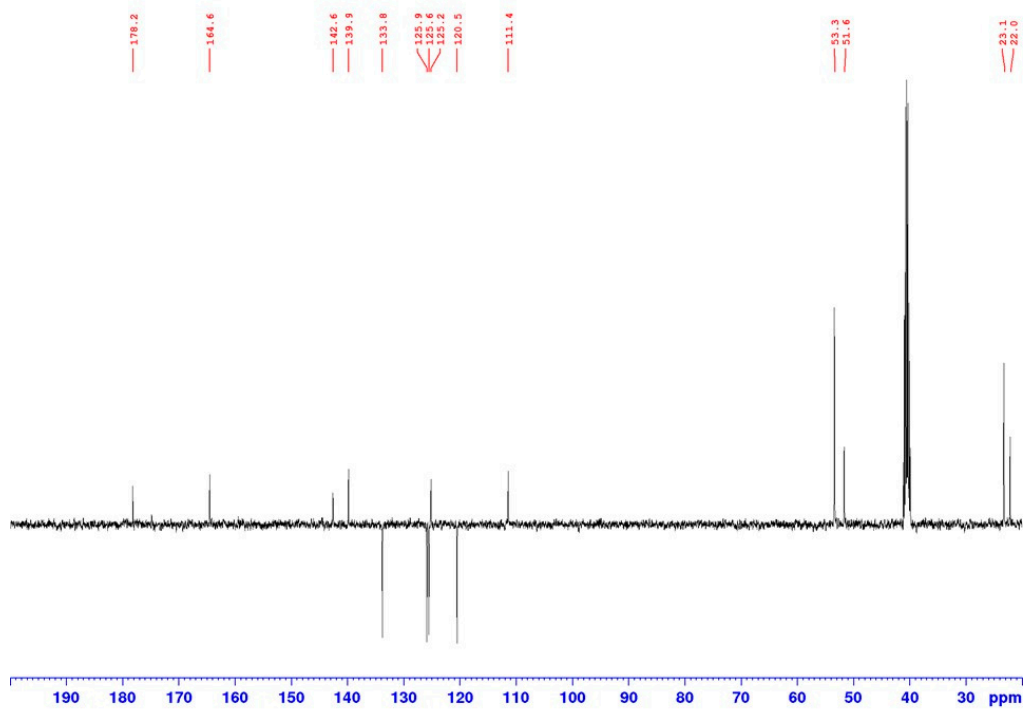

Figure S10. <sup>13</sup>C-NMR spectrum of **5b**

3-((4-Methylpiperazin-1-yl)methyl)-4-oxo-1,4-dihydroquinoline-2-carboxylic acid (5c)

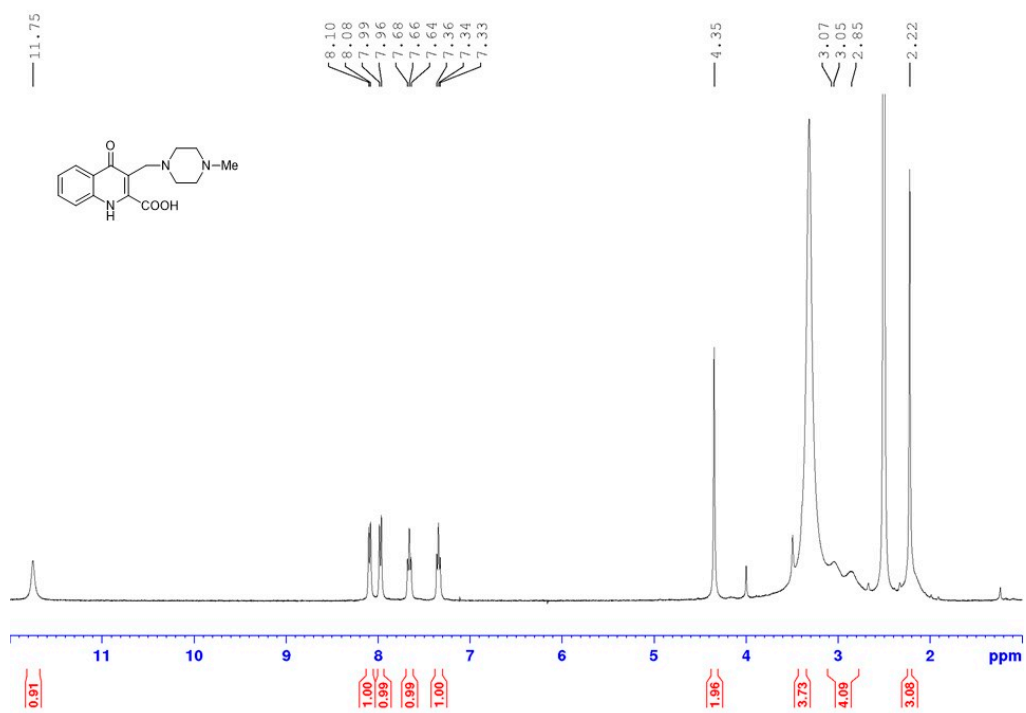

Figure S11. <sup>1</sup>H-NMR spectrum of 5c

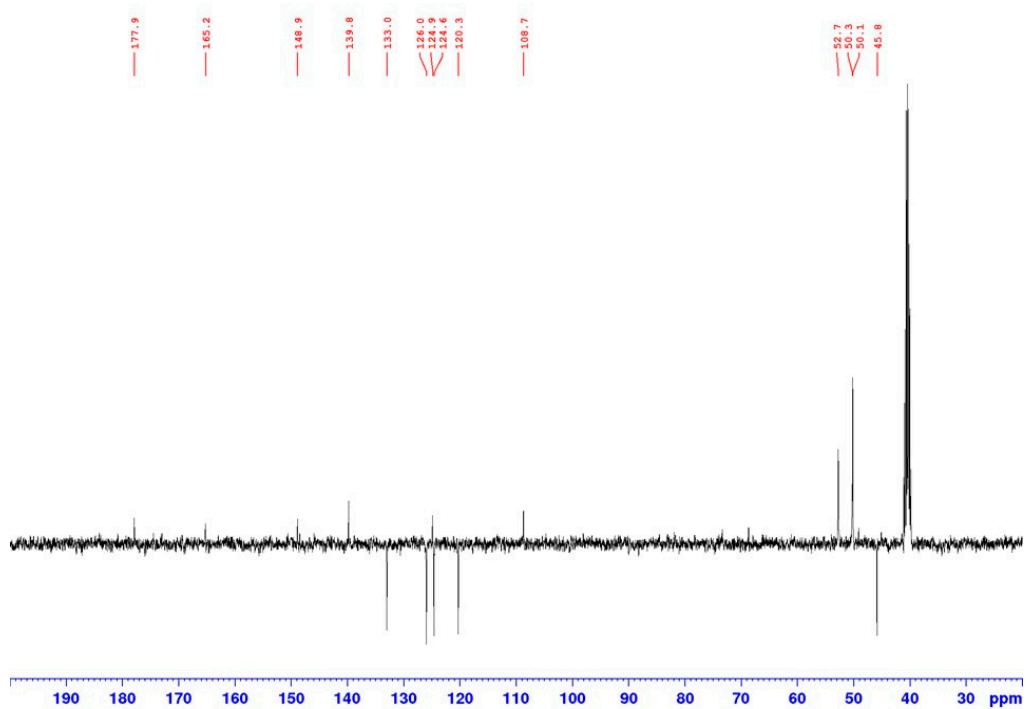

Figure S12. <sup>13</sup>C-NMR spectrum of 5c

3-((3,4-Dihydroisoquinolin-2(1H)-yl)methyl)-4-oxo-1,4-dihydroquinoline-2-carboxylic acid (6a)

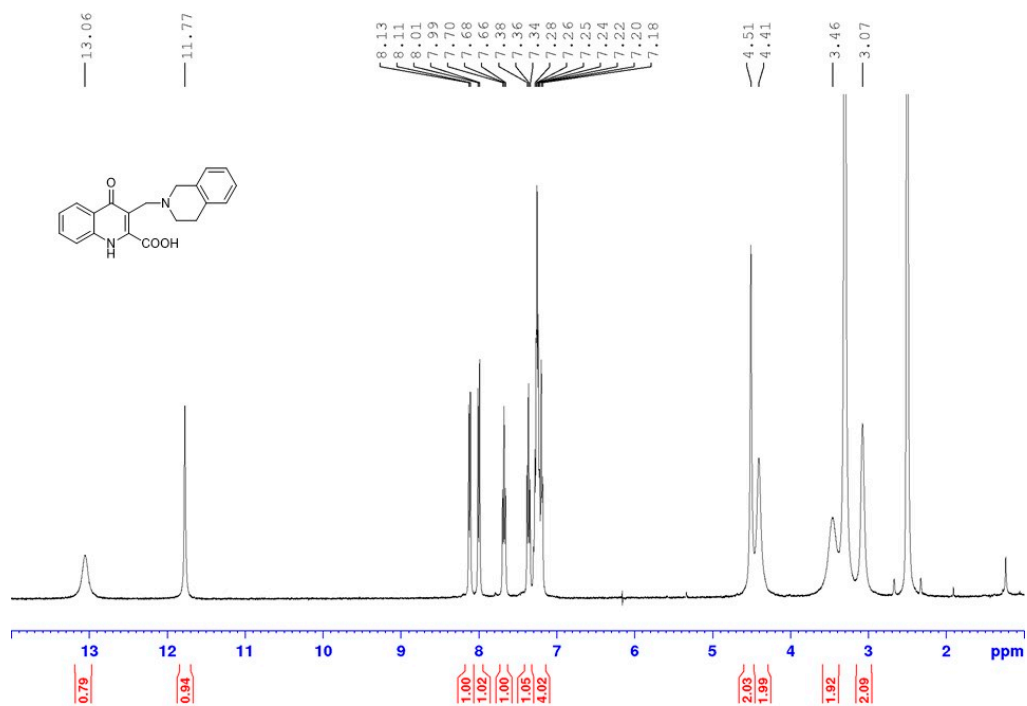

Figure S13. <sup>1</sup>H-NMR spectrum of 6a

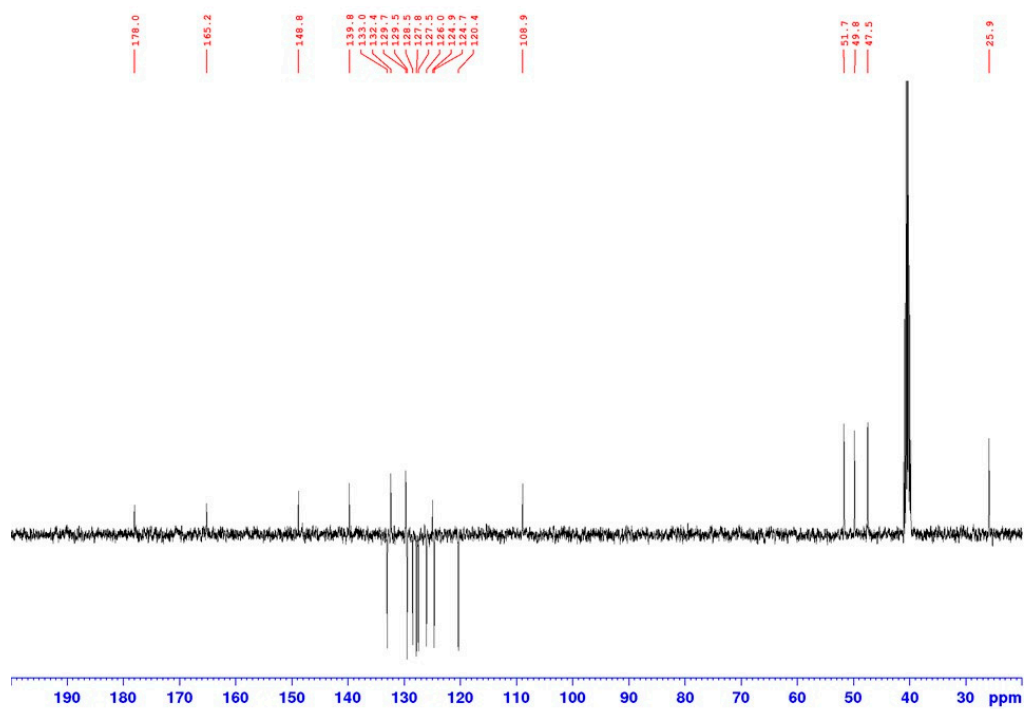

Figure S14. <sup>13</sup>C-NMR spectrum of 6a



**3-((6,7-Dimethoxy-3,4-dihydroisoquinolin-2(1H)-yl)methyl)-4-oxo-1,4-dihydroquinoline-2-carboxylic acid (6b)**

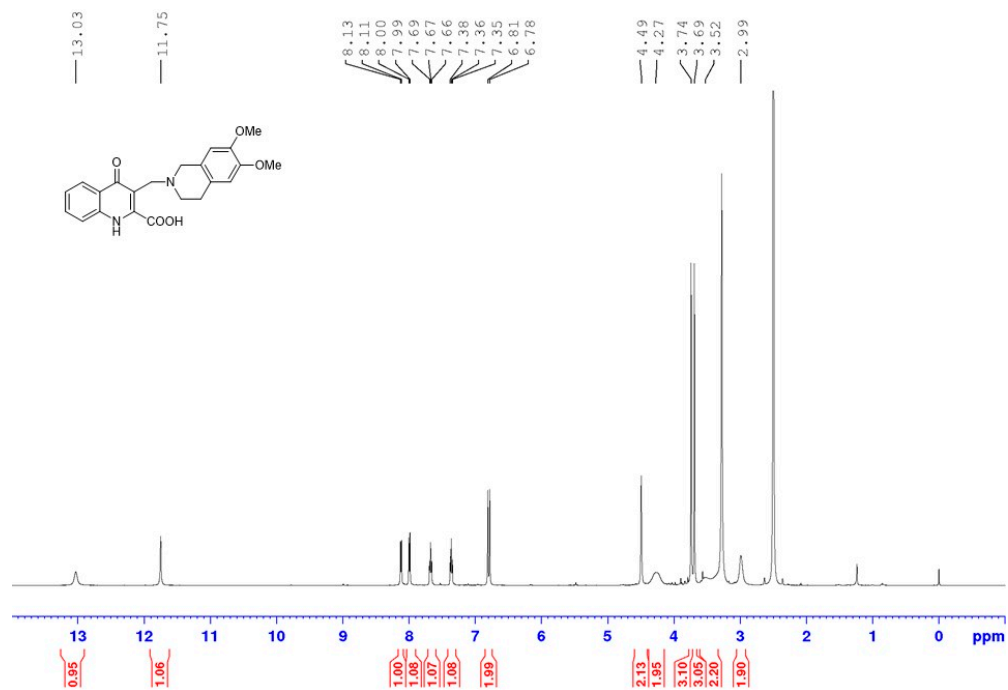

Figure S15. <sup>1</sup>H-NMR spectrum of **6b**

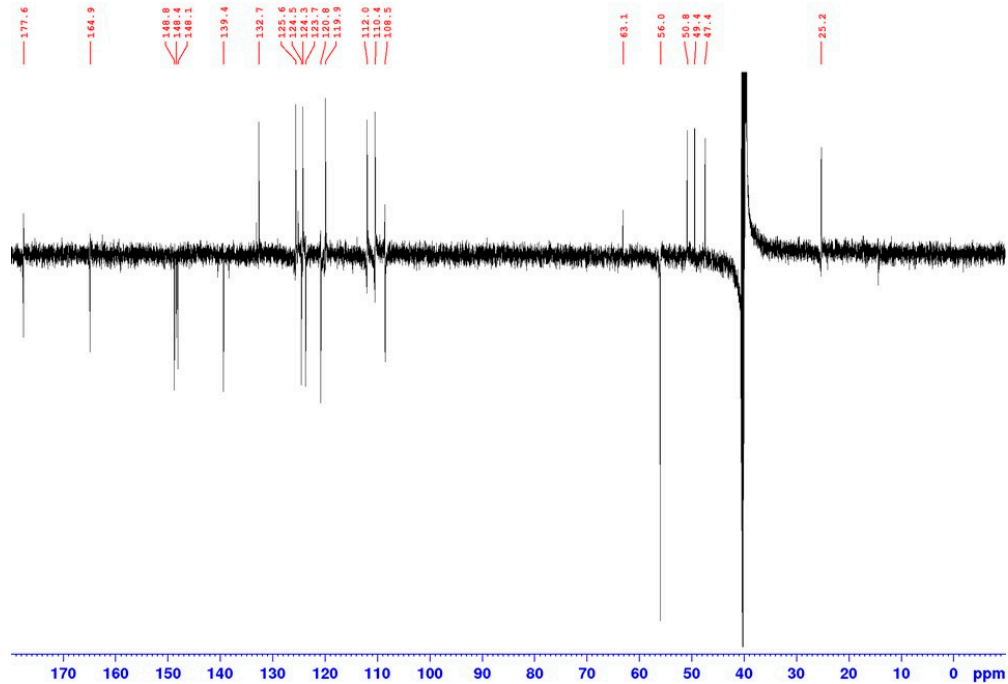

Figure S16. <sup>13</sup>C-NMR spectrum of **6b**

Ethyl 5-chloro-4-oxo-1,4-dihydroquinoline-2-carboxylate (7)

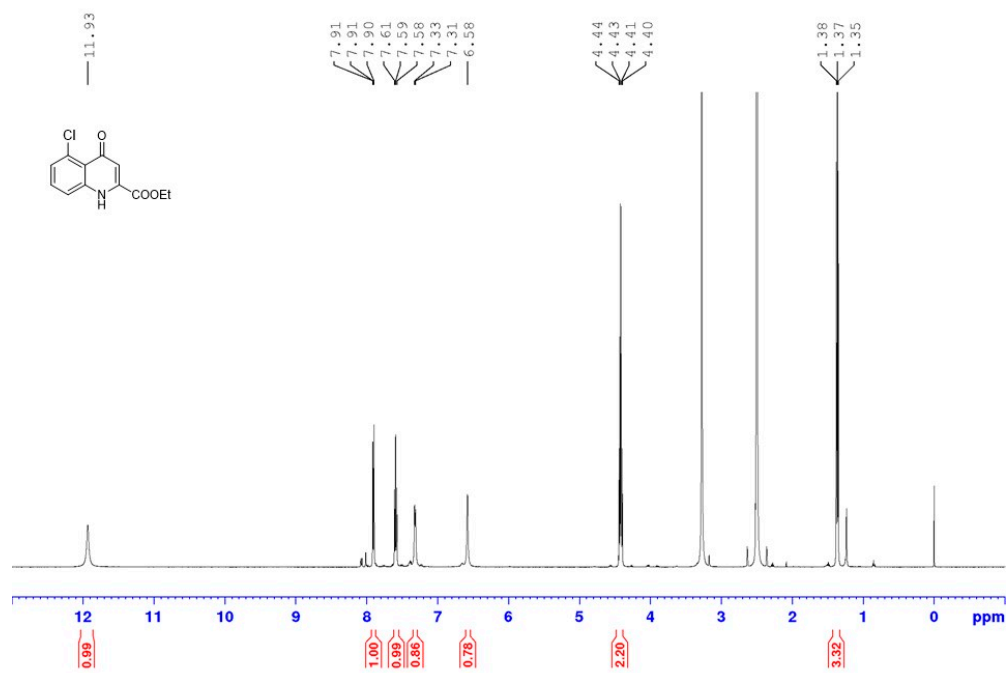

Figure S17. <sup>1</sup>H-NMR spectrum of 7

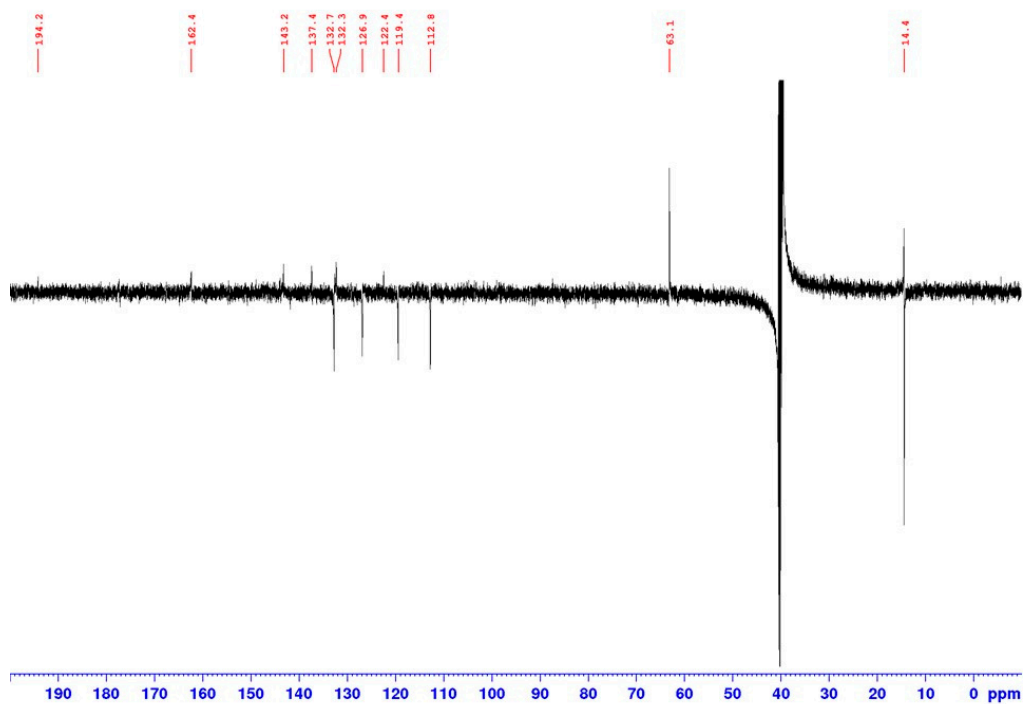

Figure S18. <sup>13</sup>C-NMR spectrum of 7

Ethyl 4-oxo-6-phenyl-1,4-dihydroquinoline-2-carboxylate (8)

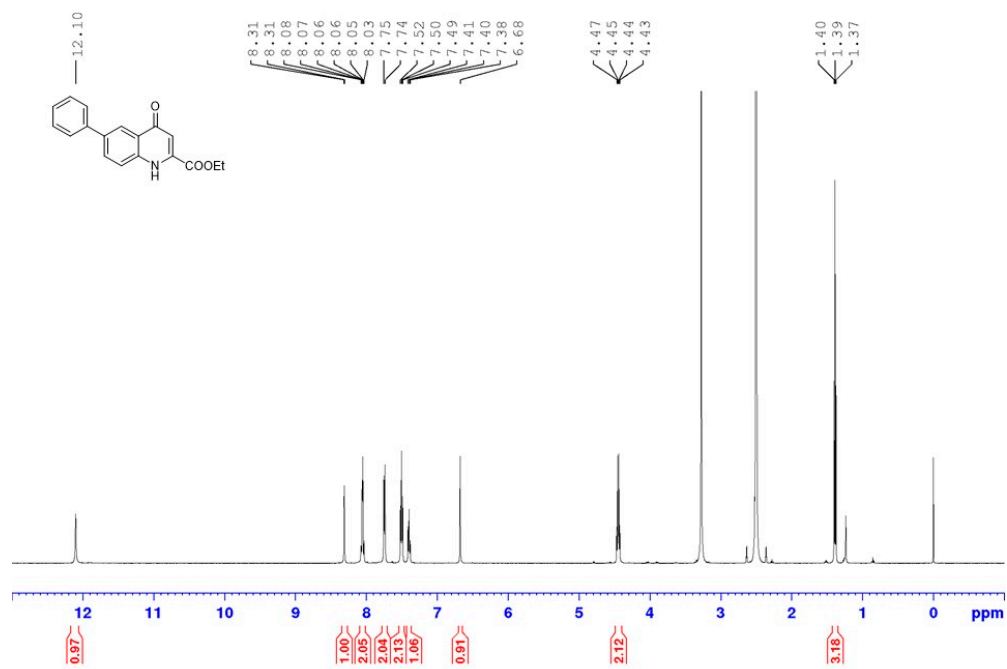

Figure S19. <sup>1</sup>H-NMR spectrum of 8

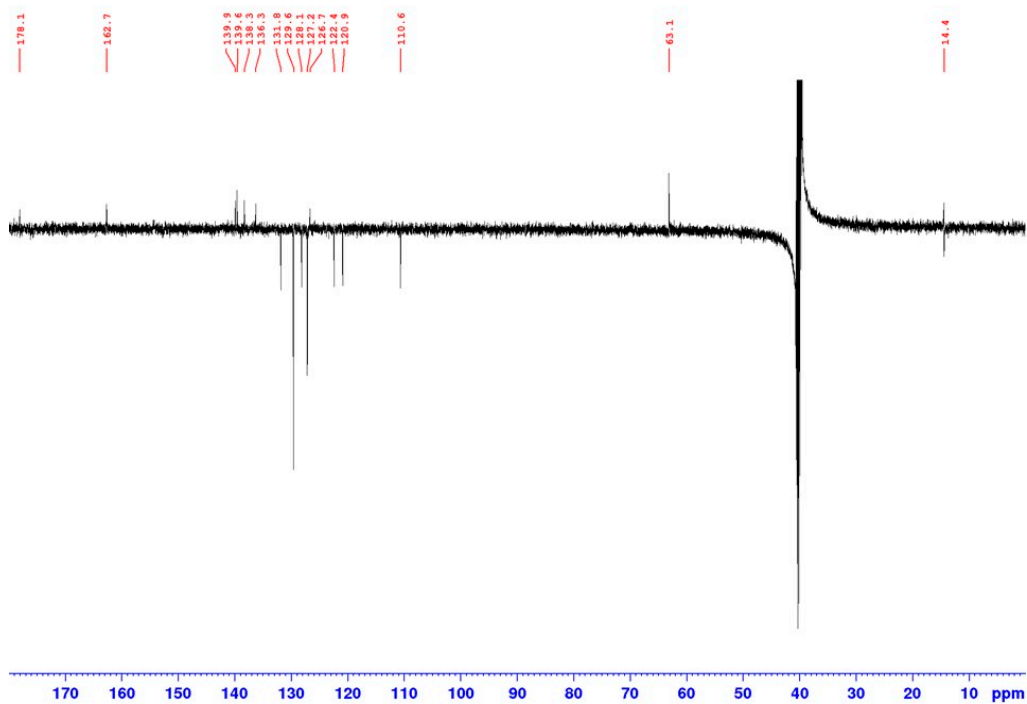

Figure S20. <sup>13</sup>C-NMR spectrum of 8

Ethyl 7-chloro-4-oxo-1,4-dihydroquinoline-2-carboxylate (9)

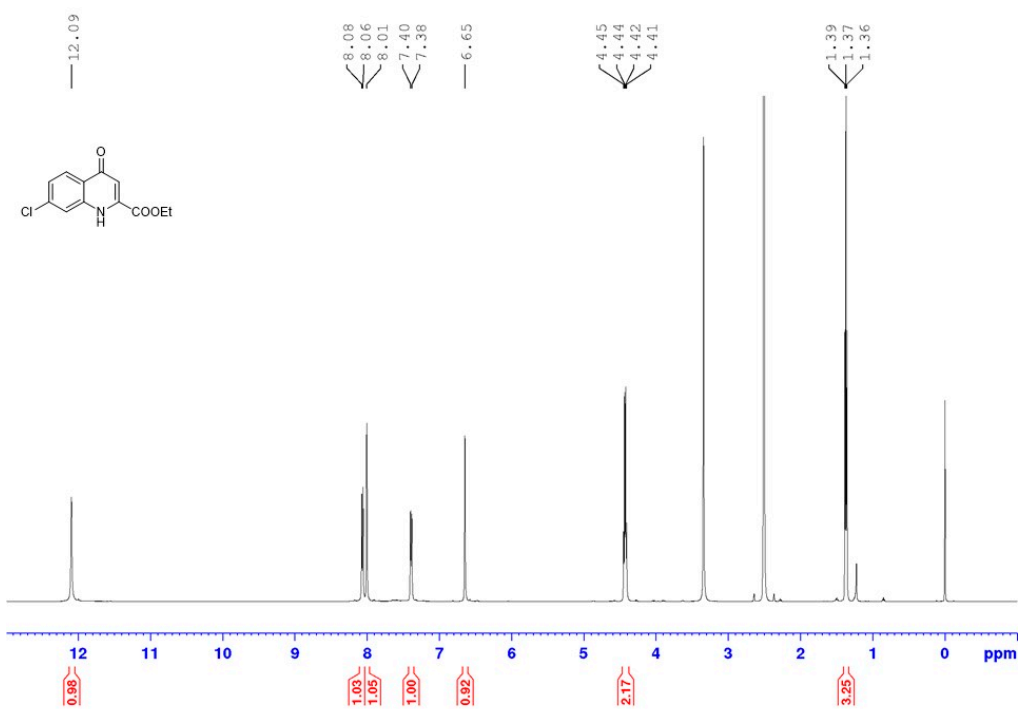

Figure S21. <sup>1</sup>H-NMR spectrum of 9

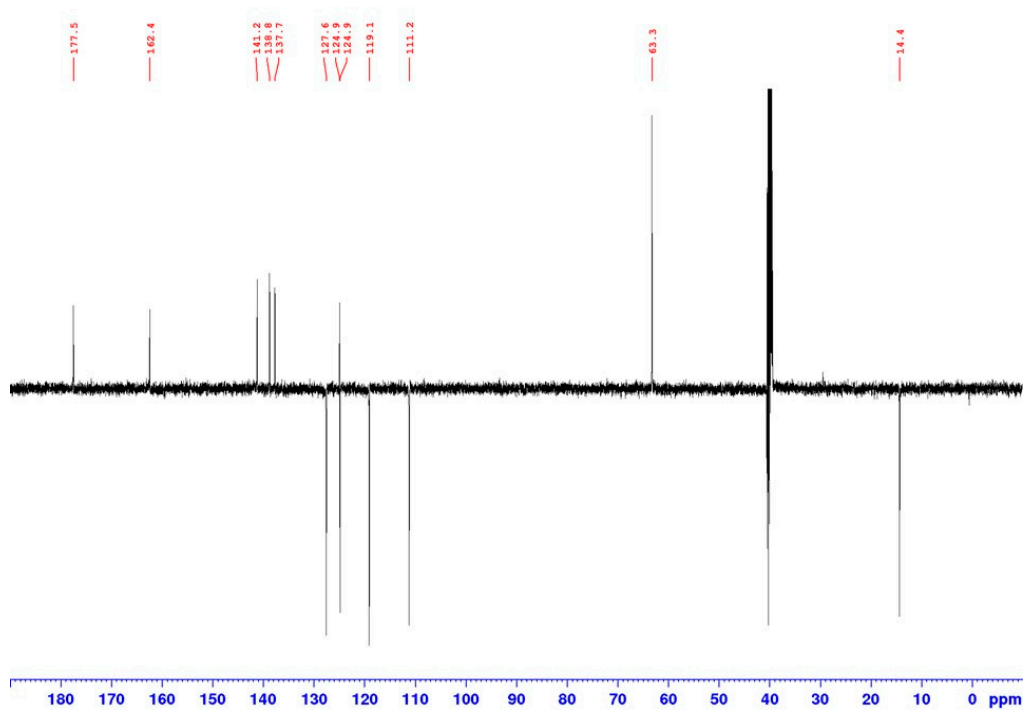

Figure S22. <sup>13</sup>C-NMR spectrum of 9

Ethyl 4-oxo-8-methyl-1,4-dihydroquinoline-2-carboxylate (10)

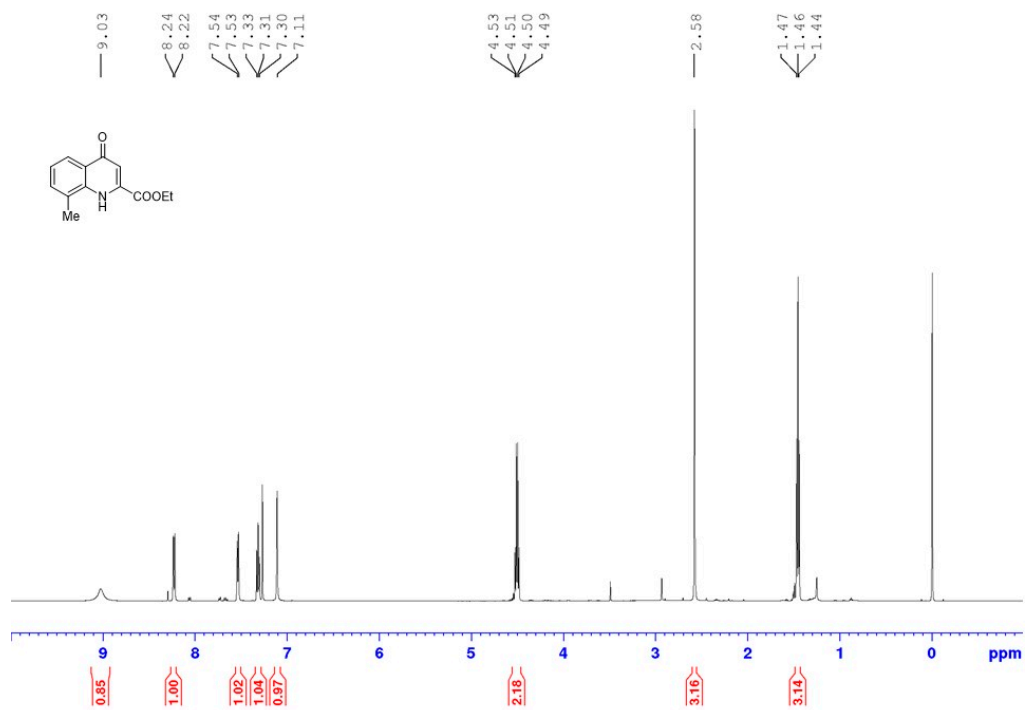

Figure S23. <sup>1</sup>H-NMR spectrum of 10

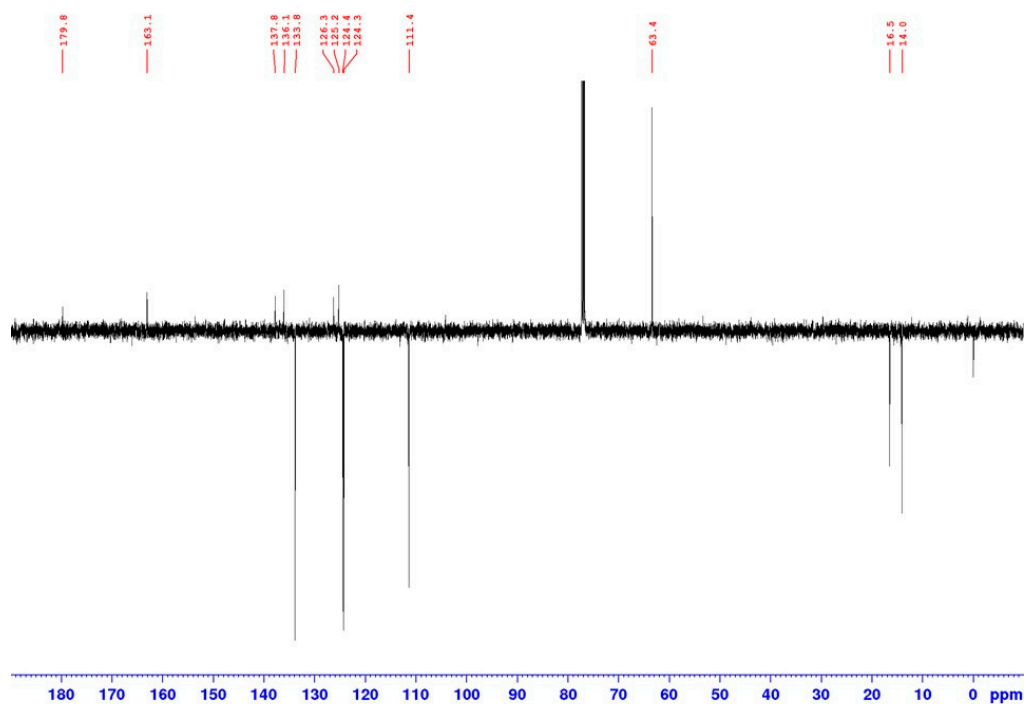

Figure S24. <sup>13</sup>C-NMR spectrum of 10

5-Chloro-3-(morpholinomethyl)-4-oxo-1,4-dihydroquinoline-2-carboxylic acid (**11**)

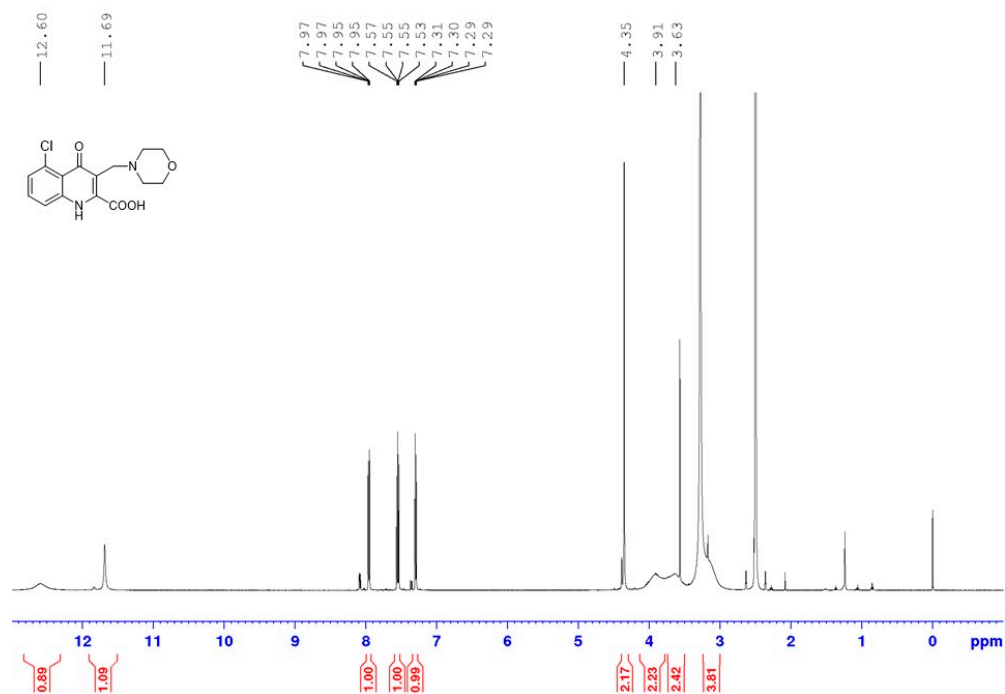

Figure S25. <sup>1</sup>H-NMR spectrum of **11**

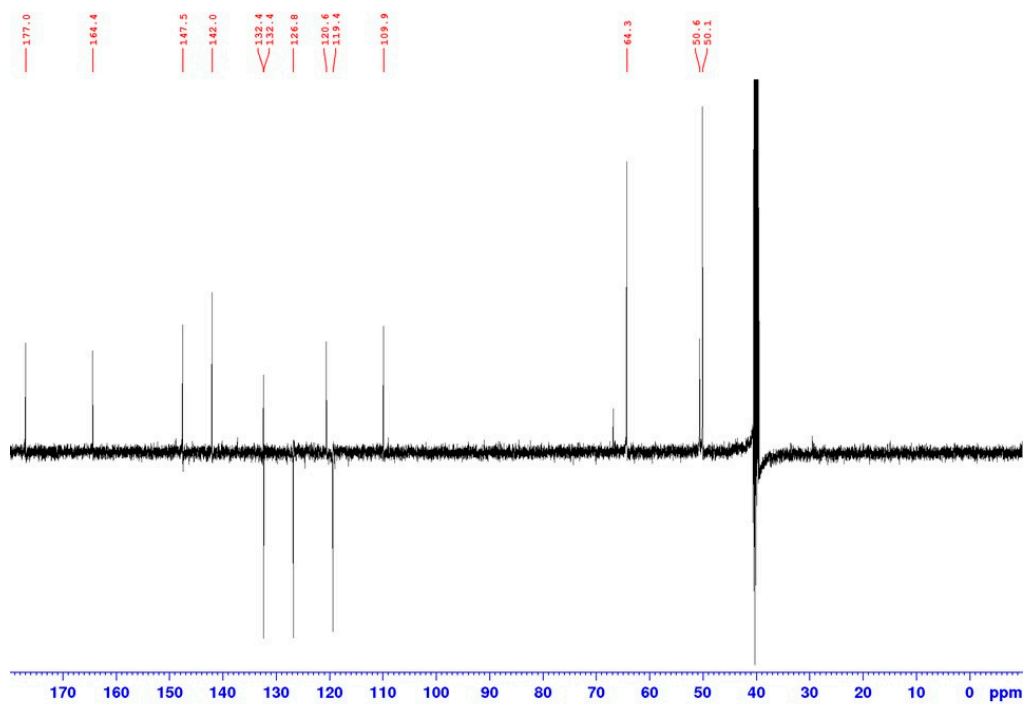

Figure S26. <sup>13</sup>C-NMR spectrum of **11**

3-(Morpholinomethyl)-4-oxo-6-phenyl-1,4-dihydroquinoline-2-carboxylic acid (**12**)

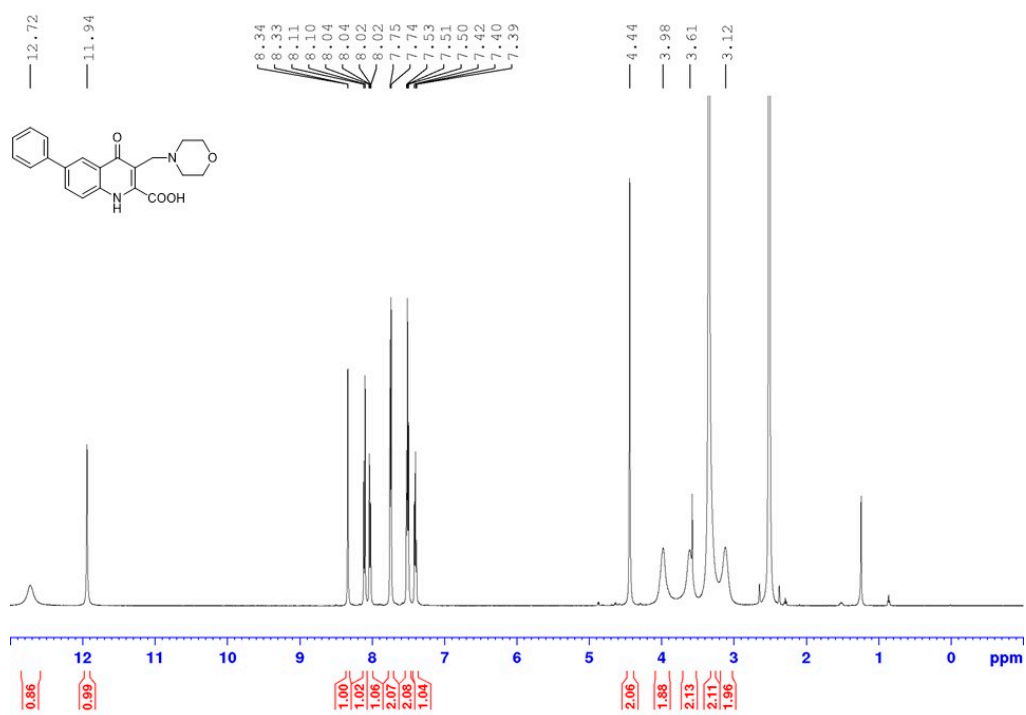

Figure S27. <sup>1</sup>H-NMR spectrum of **12**

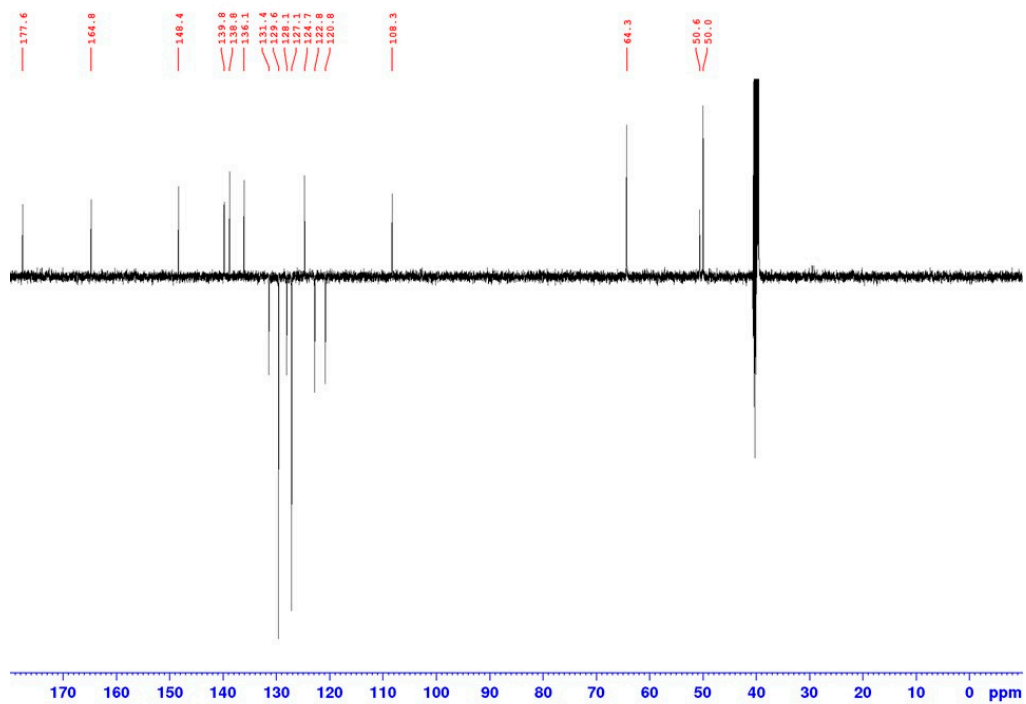

Figure S28. <sup>13</sup>C-NMR spectrum of **12**

7-Chloro-3-(morpholinomethyl)-4-oxo-1,4-dihydroquinoline-2-carboxylic acid (13)

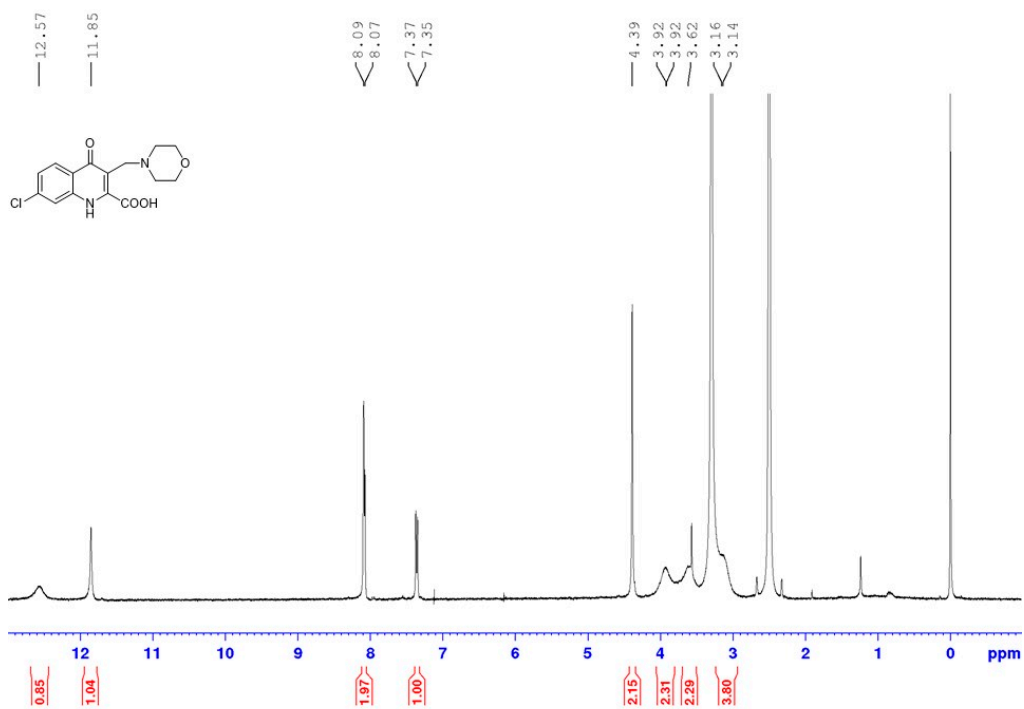

Figure S29. <sup>1</sup>H-NMR spectrum of 13

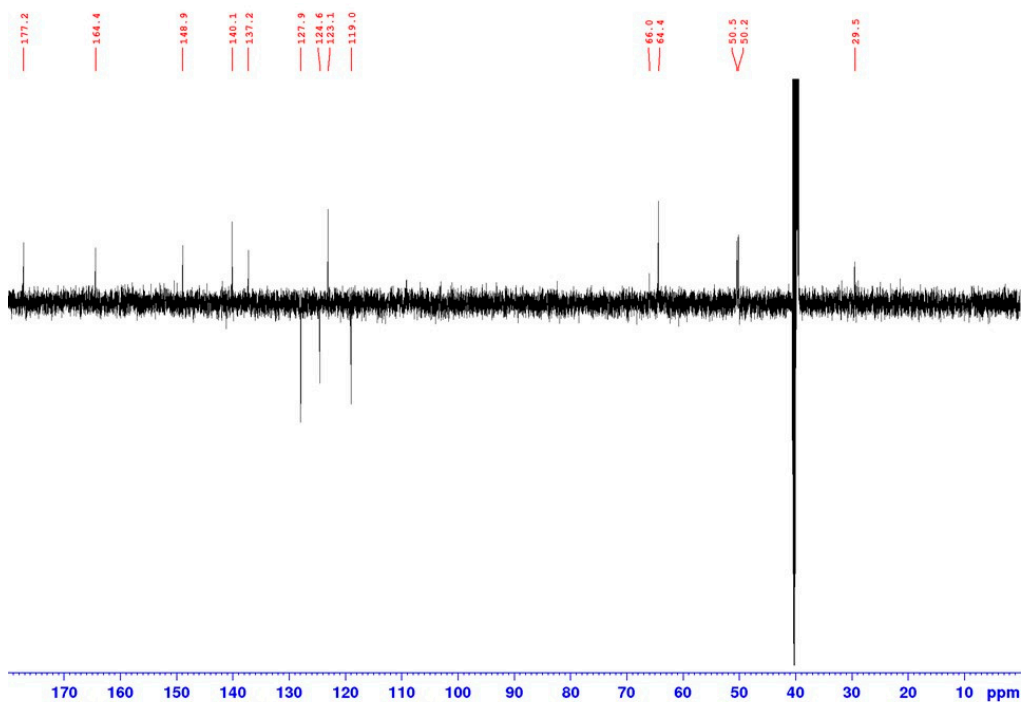

Figure S30. <sup>13</sup>C-NMR spectrum of 13



8-Methyl-3-(morpholinomethyl)-4-oxo-1,4-dihydroquinoline-2-carboxylic acid (**14**)

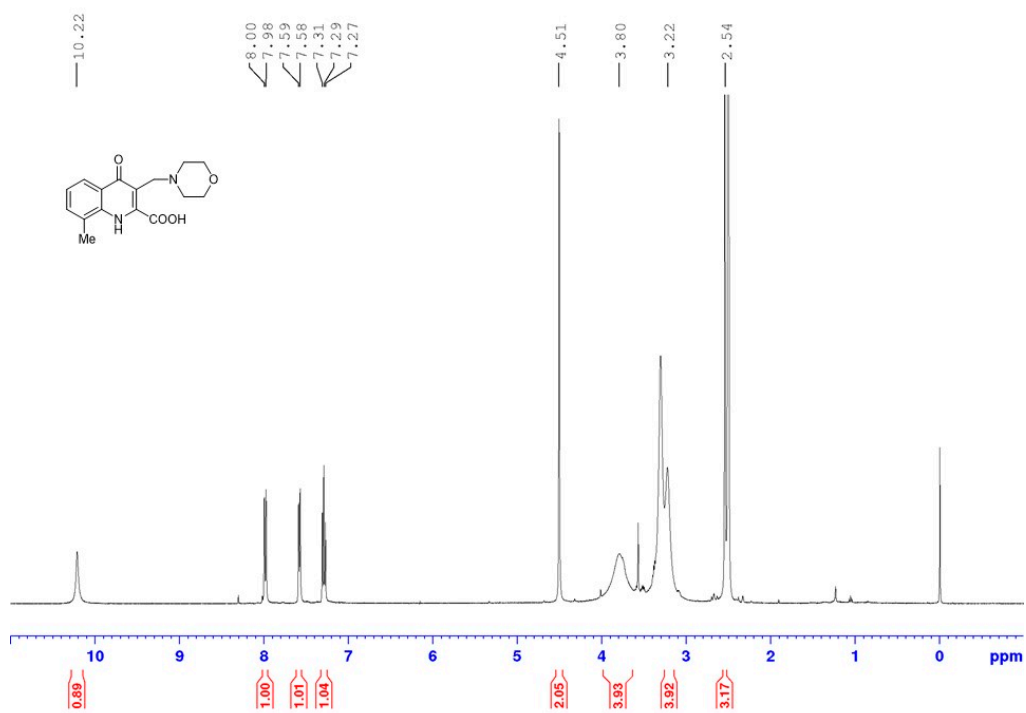

Figure S31. <sup>1</sup>H-NMR spectrum of **14**

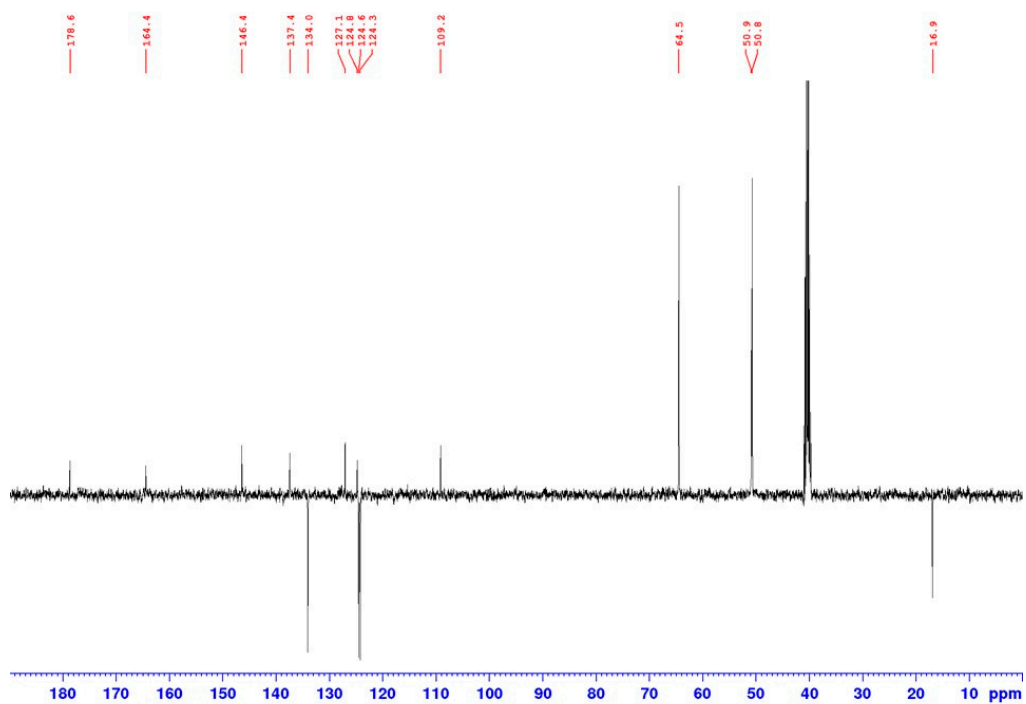

Figure S32. <sup>13</sup>C-NMR spectrum of **14**

***N*-2-(Dimethylamino)ethyl-4-oxo-3-(pyrrolidin-1-ylmethyl)-1,4-dihydroquinoline-2-carboxamide (18a)**

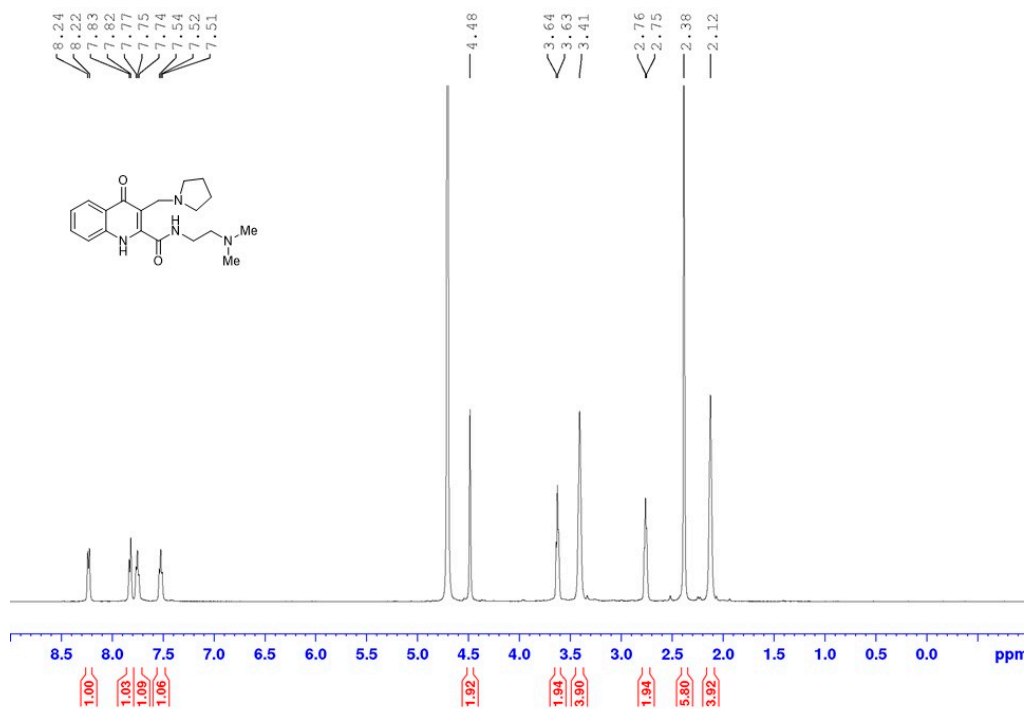

Figure S33. <sup>1</sup>H-NMR spectrum of **18a**

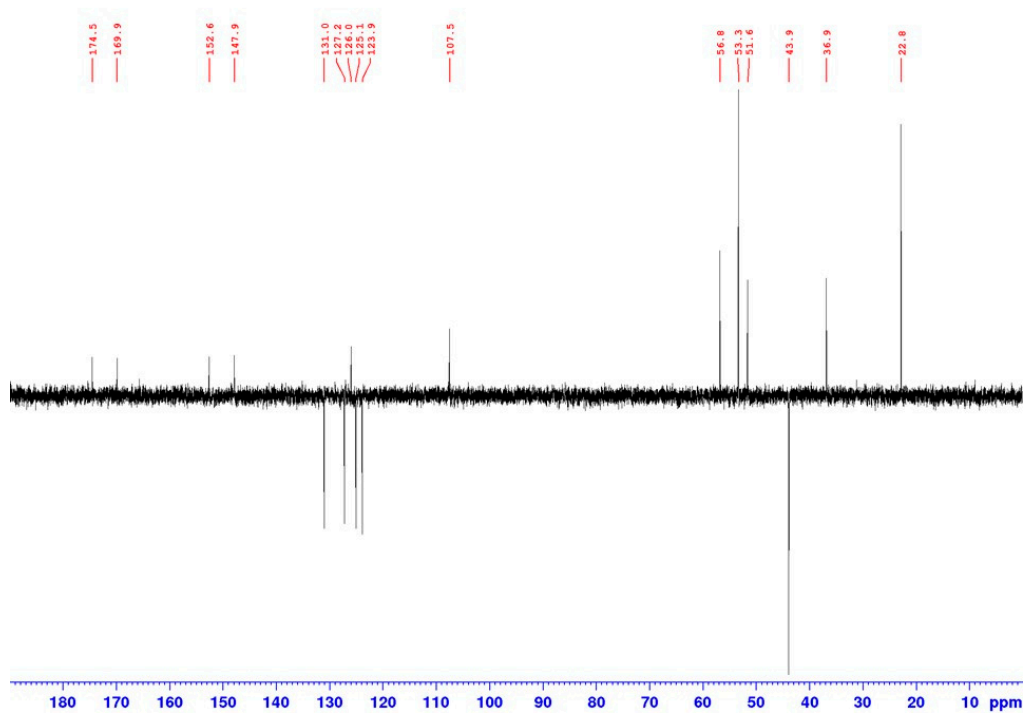

Figure S34. <sup>13</sup>C-NMR spectrum of **18a**

**N-(2-(Dimethylamino)ethyl)-4-oxo-3-(piperidin-1-ylmethyl)-1,4-dihydroquinoline-2-carboxamide (18b)**

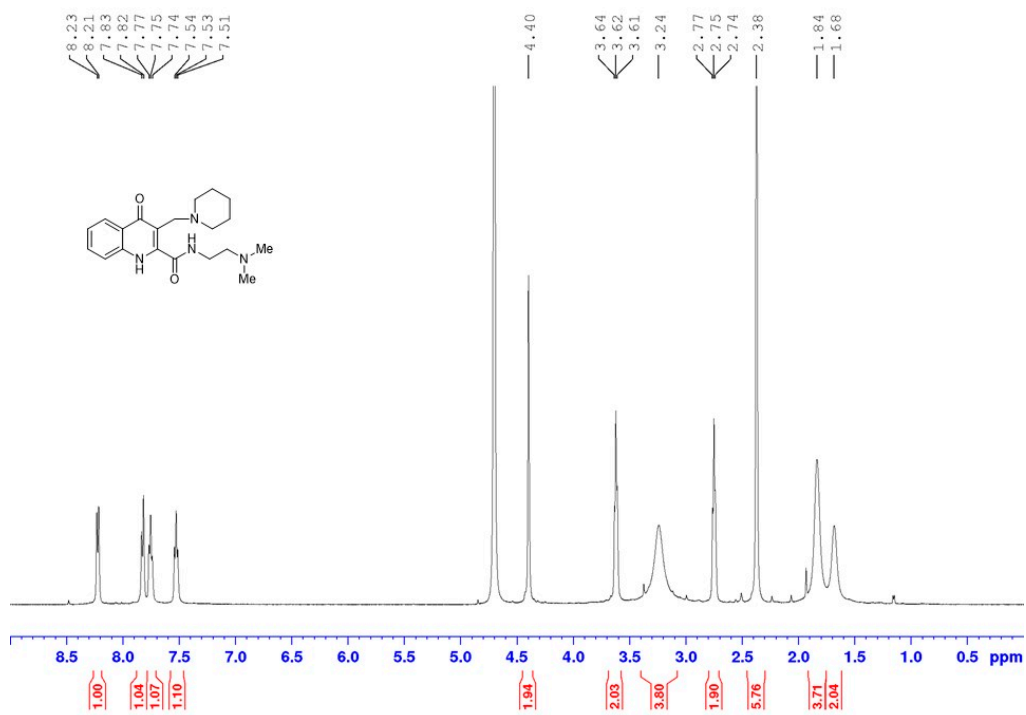

Figure S35. <sup>1</sup>H-NMR spectrum of **18b**

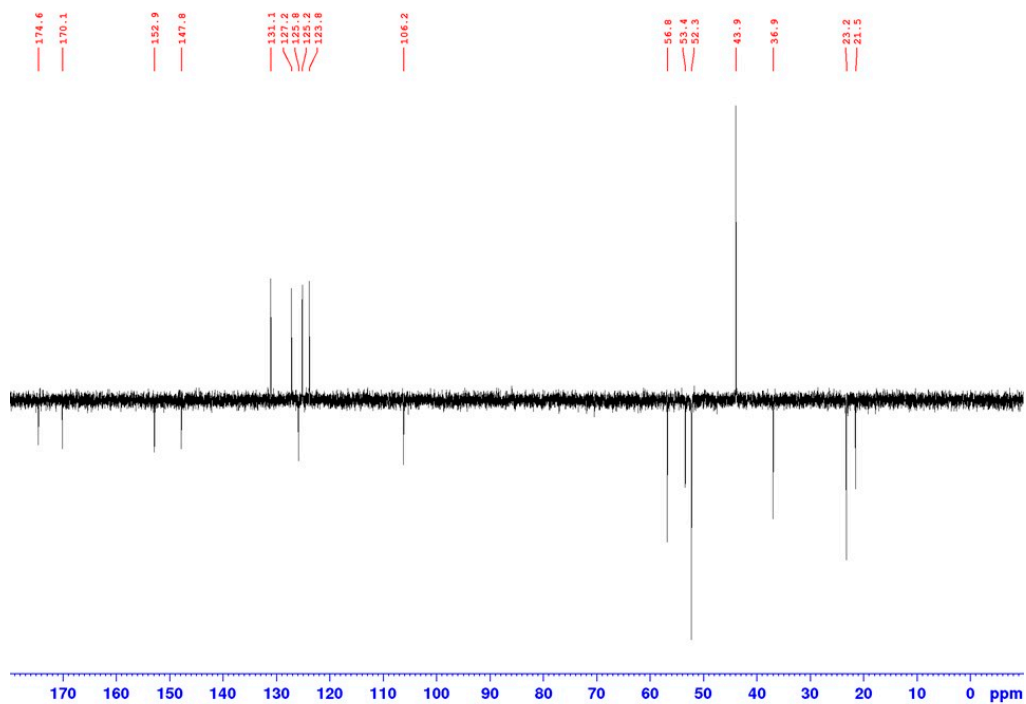

Figure S36. <sup>13</sup>C-NMR spectrum of **18b**

**N-(2-(Dimethylamino)ethyl)-3-(morpholinomethyl)-4-oxo-1,4-dihydroquinoline-2-carboxamide (18c)**

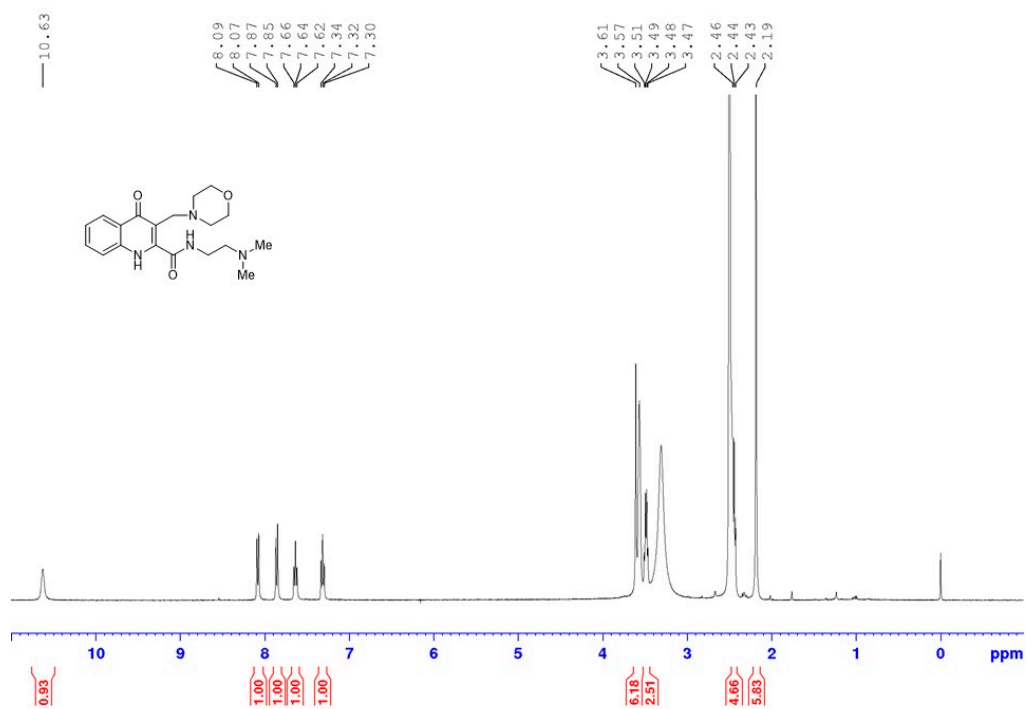

Figure S37. <sup>1</sup>H-NMR spectrum of 18c

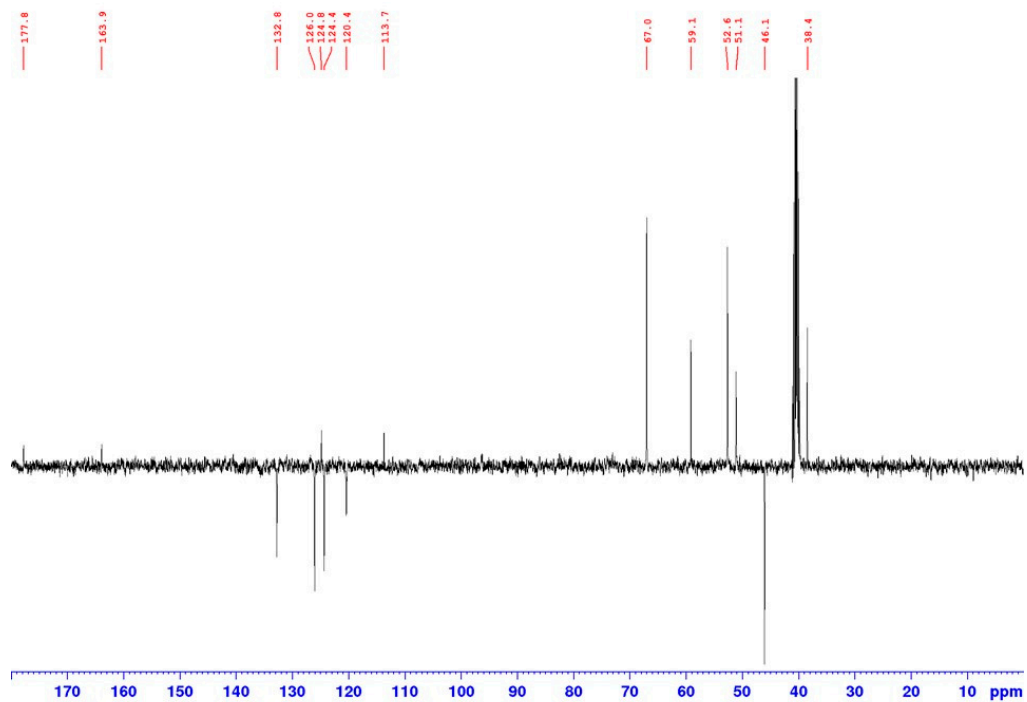

Figure S38. <sup>13</sup>C-NMR spectrum of 18c

4-oxo-*N*-(2-(pyrrolidin-1-yl)ethyl)-3-(pyrrolidin-1-ylmethyl)-1,4-dihydroquinoline-2-carboxamide (19a)

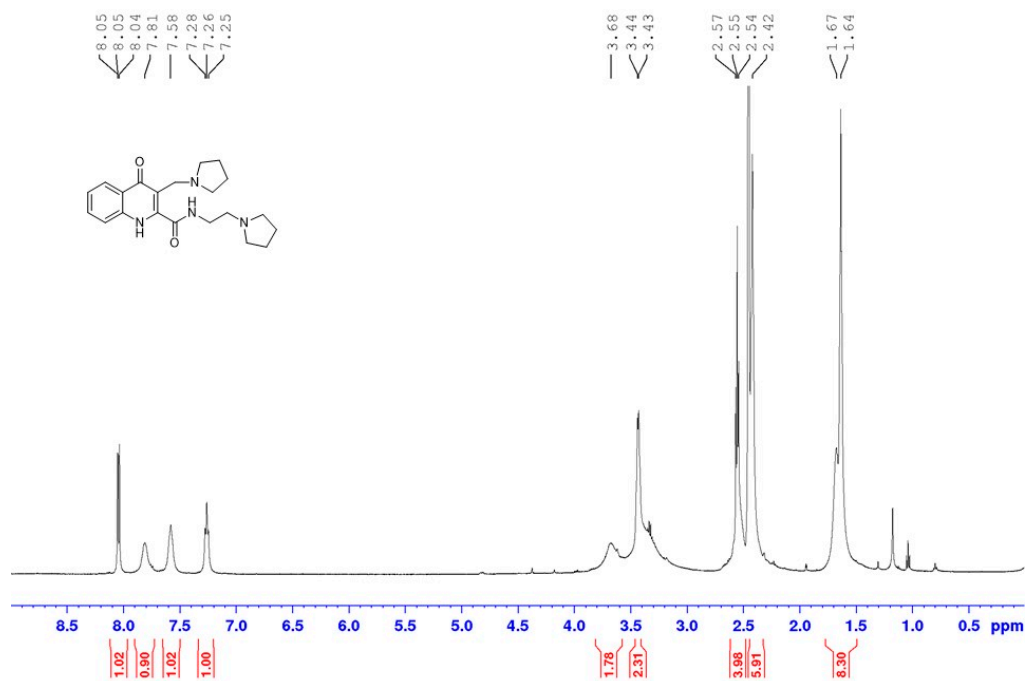

Figure S39. <sup>1</sup>H-NMR spectrum of 19a

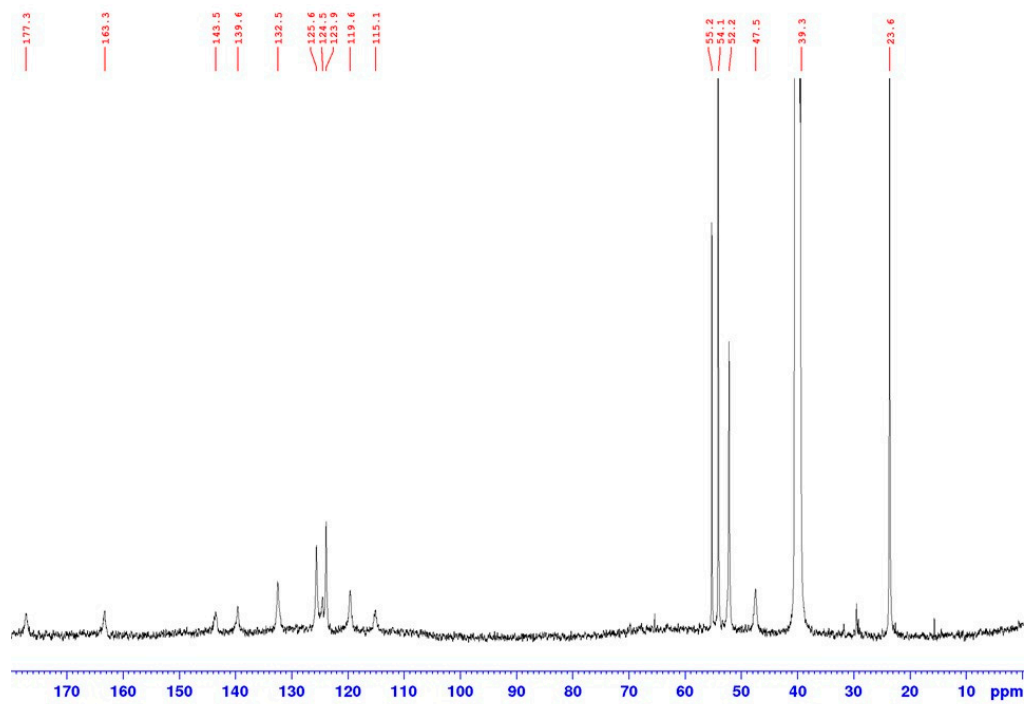

Figure S40. <sup>13</sup>C-NMR spectrum of 19a

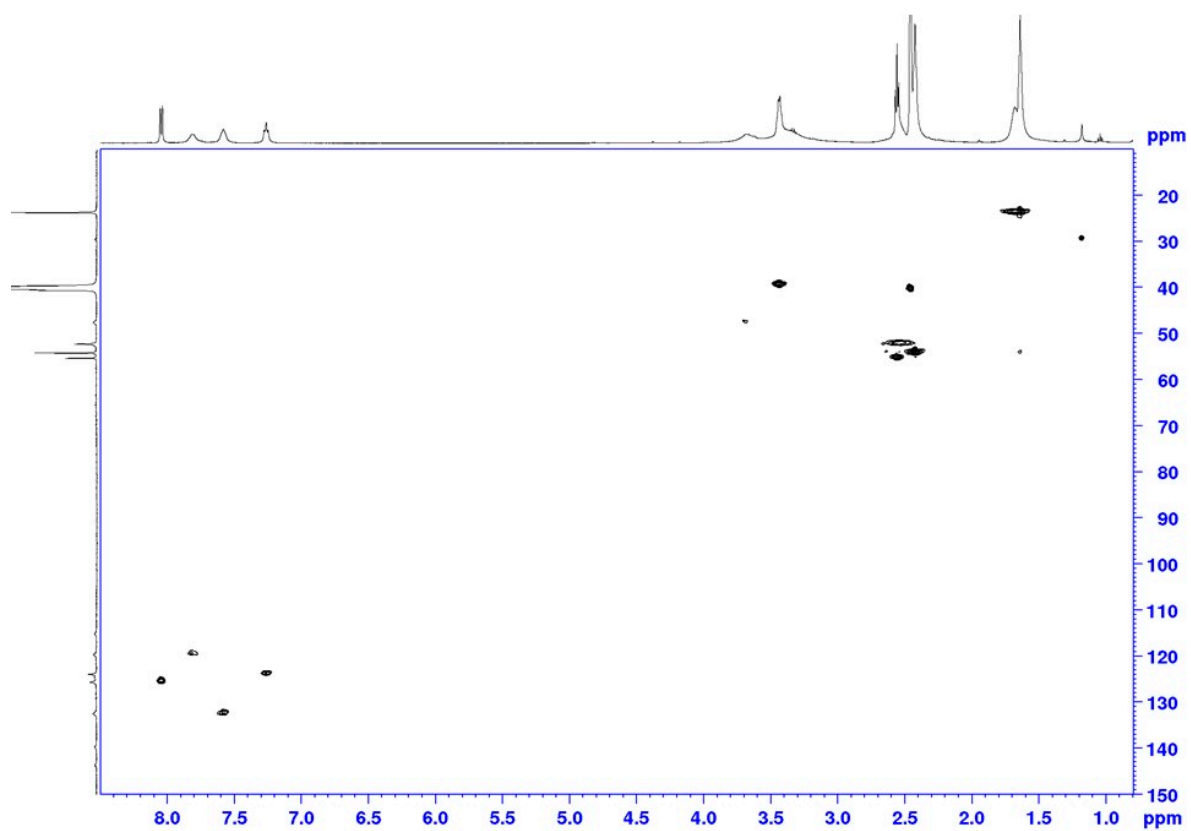

Figure S41. HSQC-NMR spectrum of **19a**

**4-oxo-N-(2-(pyrrolidin-1-yl)ethyl)-3-(pyrrolidin-1-ylmethyl)-1,4-dihydroquinoline-2-carboxamide (19b)**

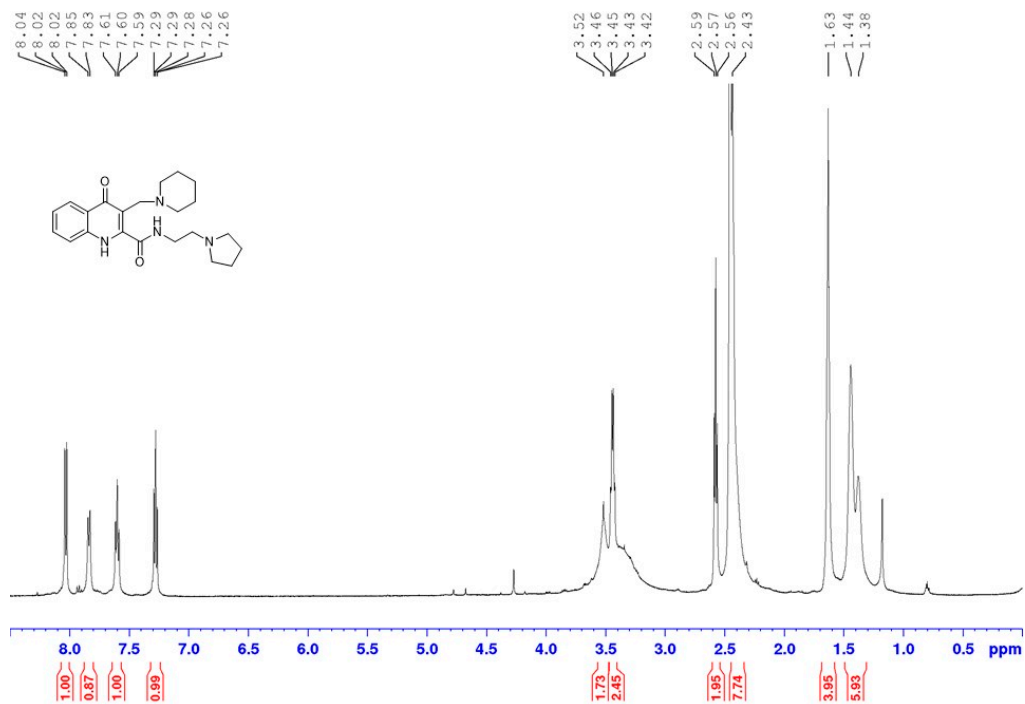

Figure S42. <sup>1</sup>H-NMR spectrum of **19b**

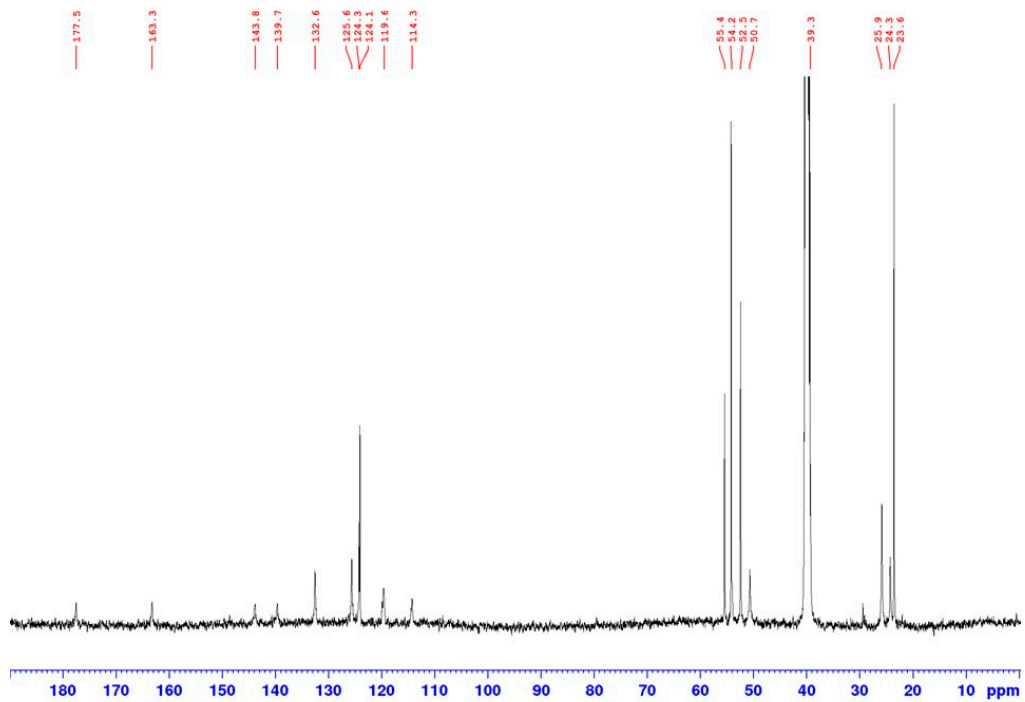

Figure S43. <sup>13</sup>C-NMR spectrum of **19b**

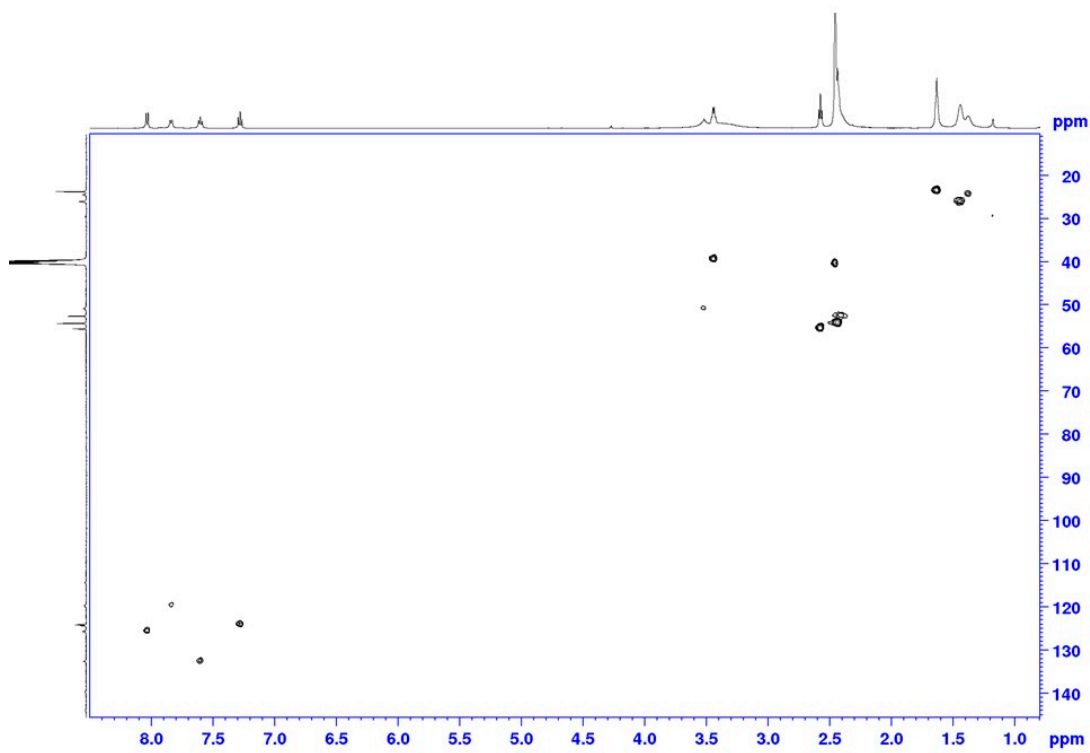

Figure S44. HSQC-NMR spectrum of **19b**

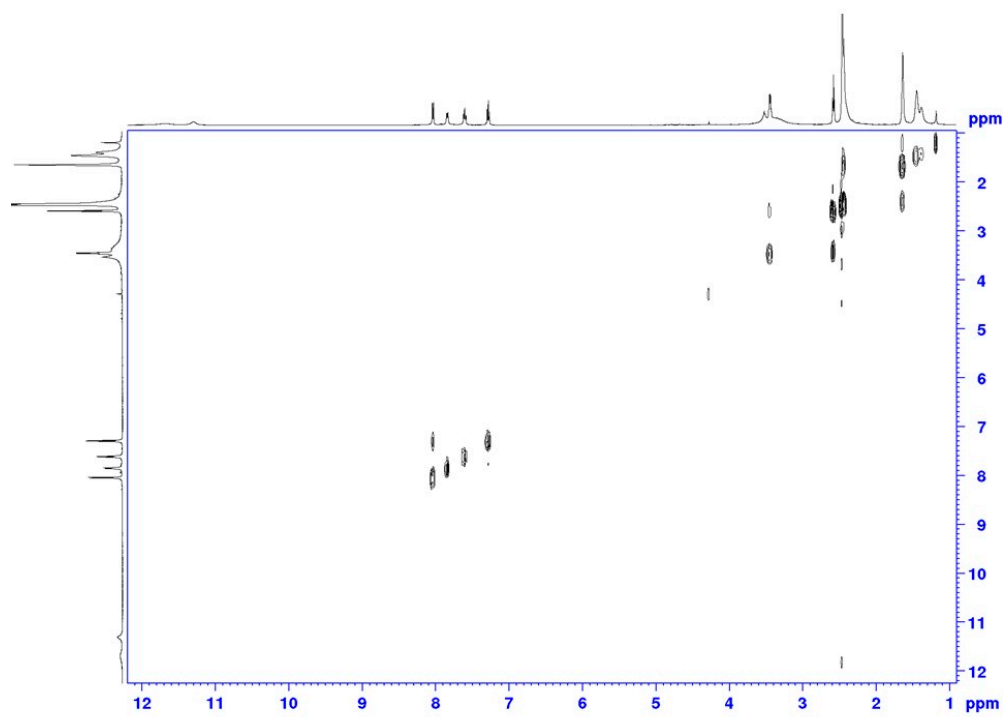

Figure S45. COSY-NMR spectrum of **19b**



**4-Oxo-3-(morpholinomethyl)-N-(2-(pyrrolidin-1-yl)ethyl)-1,4-dihydroquinoline-2-carboxamide (19c)**

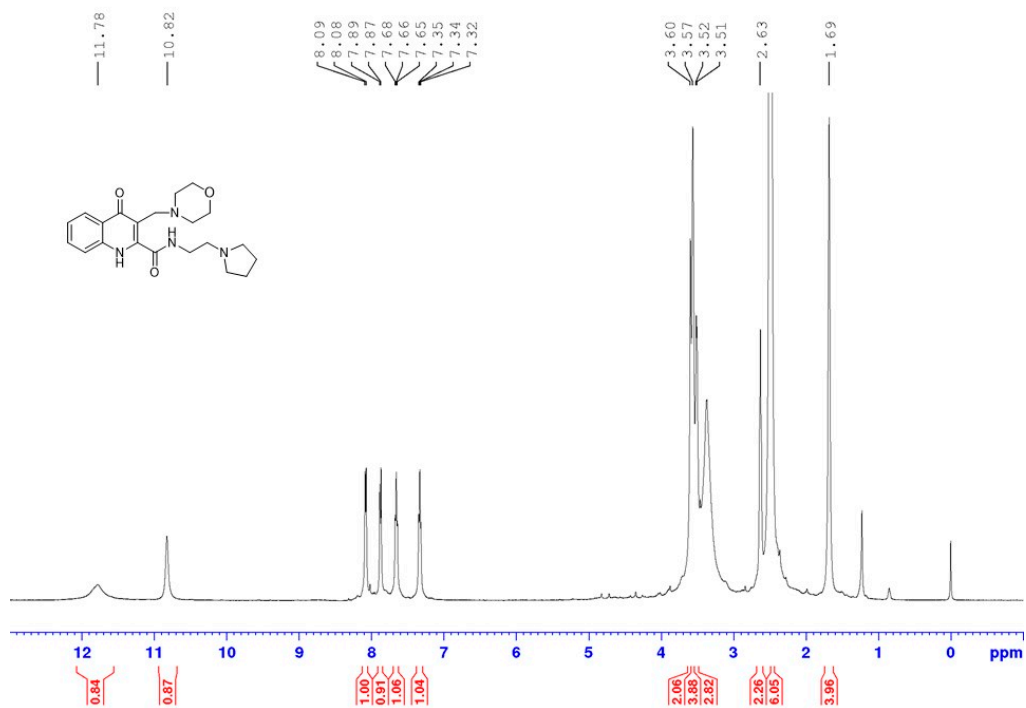

Figure S46. <sup>1</sup>H-NMR spectrum of 19c

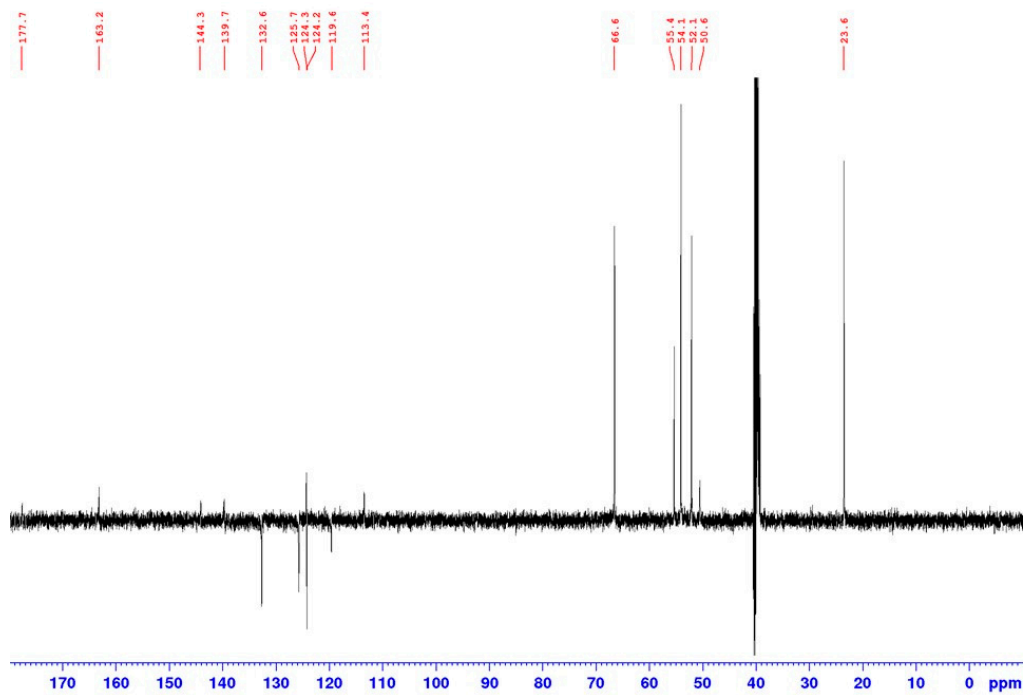

Figure S47. <sup>13</sup>C-NMR spectrum of 19c

### 4-oxo-1,4-dihydroquinoline-2-carboxamide (20)

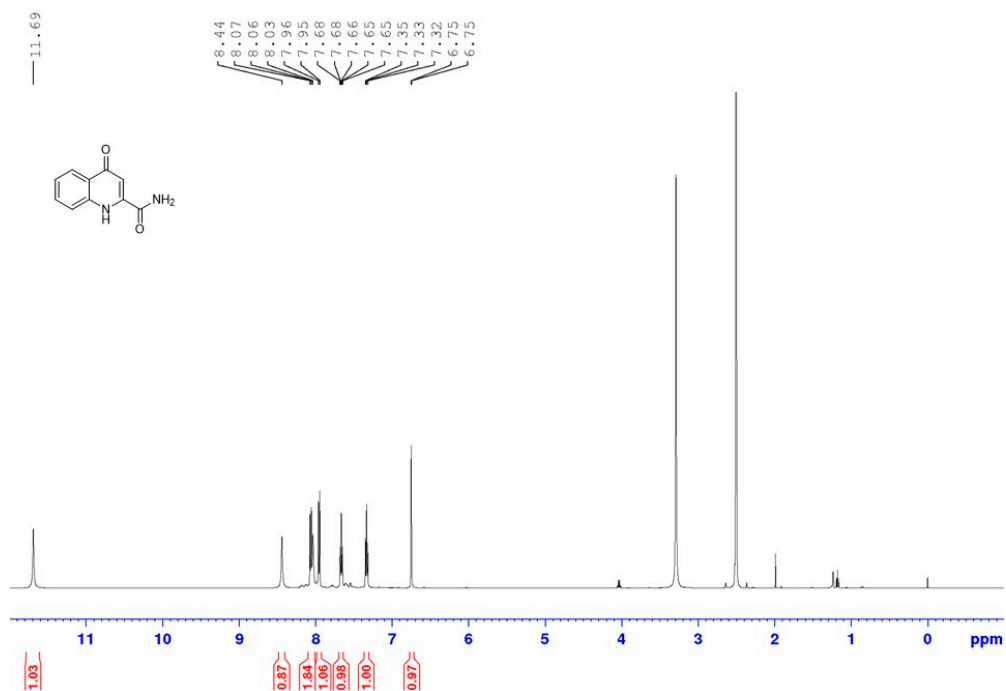

Figure S48. <sup>1</sup>H-NMR spectrum of 20

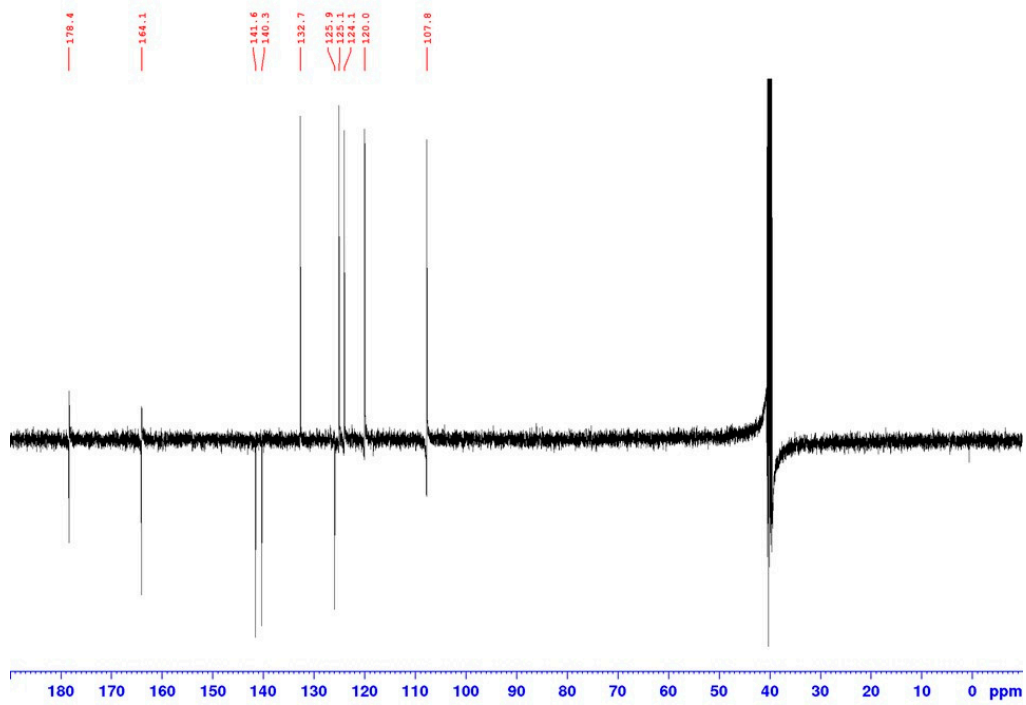

Figure S49. <sup>13</sup>C-NMR spectrum of 20

3-(Morpholinomethyl)-4-oxo-1,4-dihydroquinoline-2-carboxamide (21)

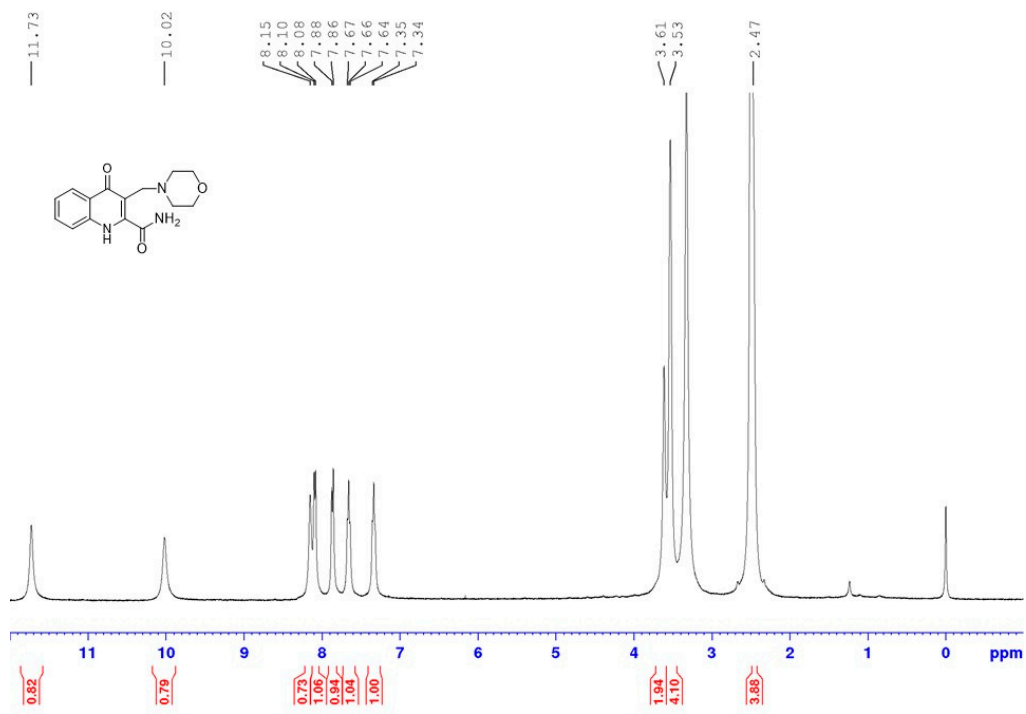

Figure S50. <sup>1</sup>H-NMR spectrum of 21

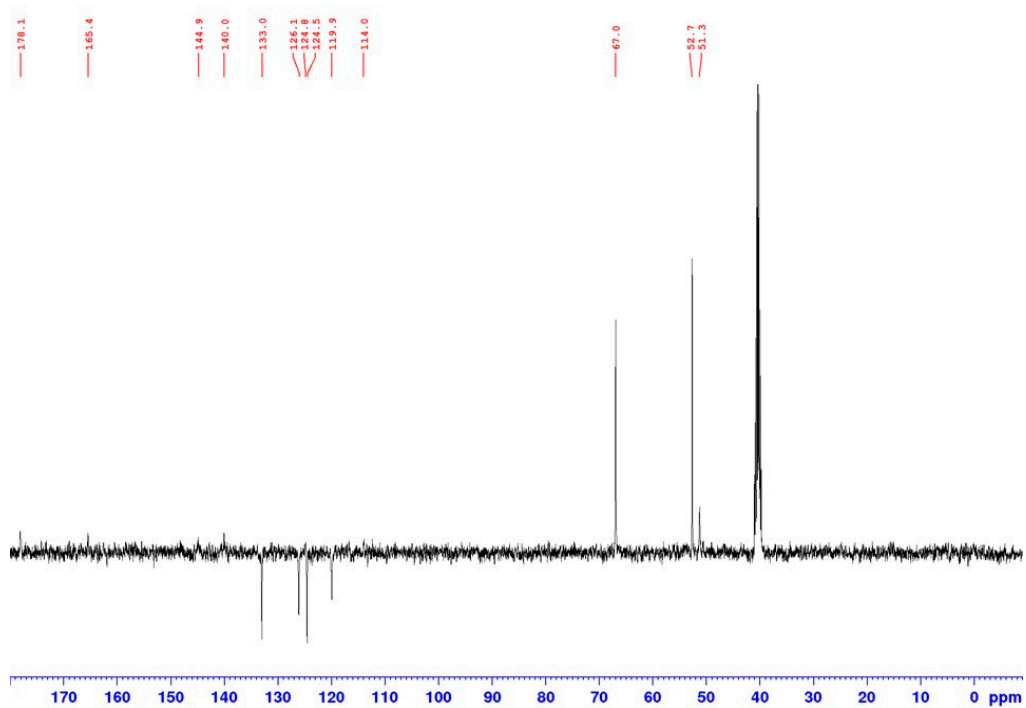

Figure S51. <sup>13</sup>C-NMR spectrum of 21

Methyl 3-(morpholinomethyl)-4-oxo-1,4-dihydroquinoline-2-carboxylate (22)

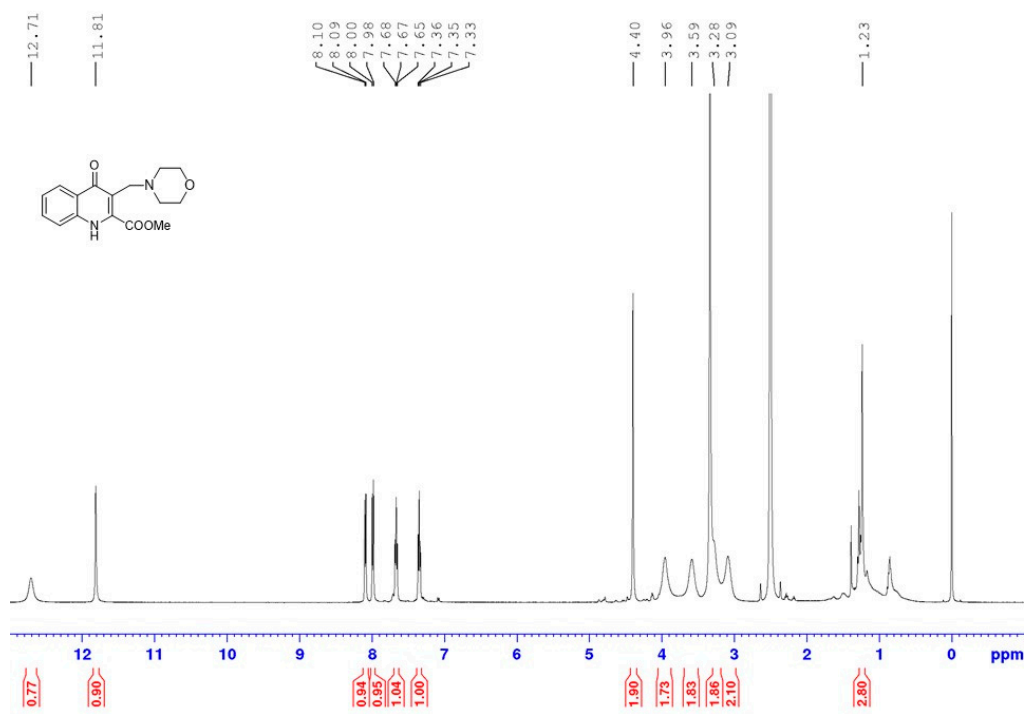

Figure S52. <sup>1</sup>H-NMR spectrum of 22

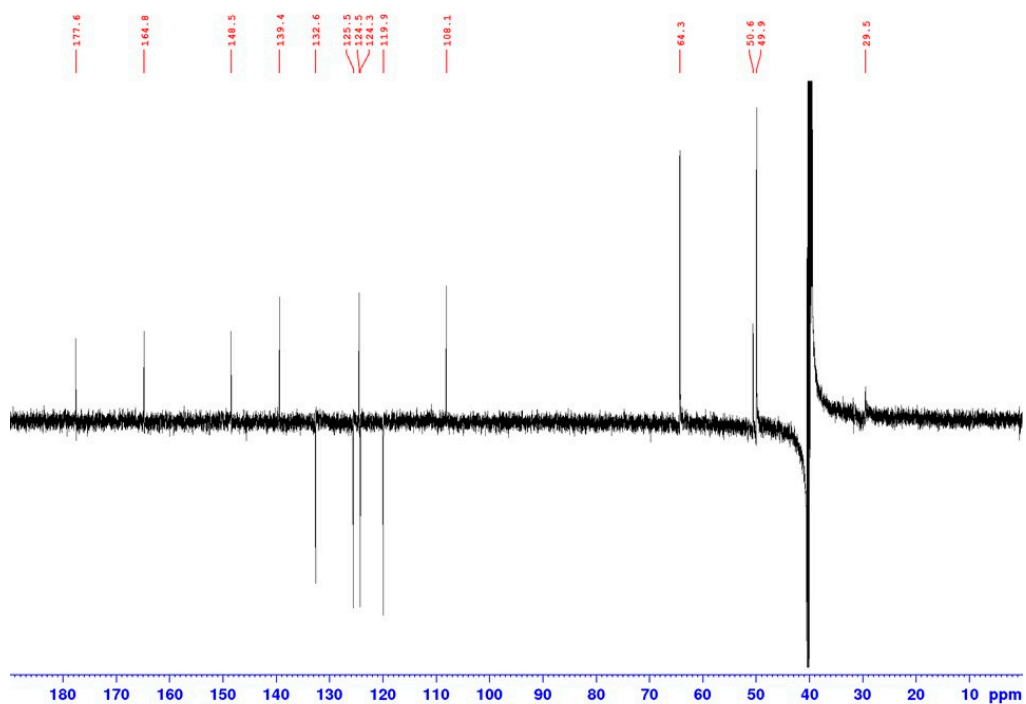

Figure S53. <sup>13</sup>C-NMR spectrum of 22
